# Supplementary material for: Diastereoselective, multicomponent access to trans-2-aryl-4-arylamino-1,2,3,4-tetrahydroquinolines via an AA′BC sequential four-component reaction and their application to 2-arylquinoline synthesis
Source: Royal Society of Chemistry journal article supplement (doi:10.1039/c2ob26754c), 2012-10-06

*Supporting Information*

**Diastereoselective, multicomponent access to *trans*-2-aryl-4-arylamino-1,2,3,4-tetrahydroquinolines *via* an AA'BC sequential four-component reaction and study of their synthetic applications**

Pascual Ribelles,<sup>a</sup> Vellaisamy Sridharan,<sup>a</sup> Mercedes Villacampa,<sup>a</sup> M<sup>a</sup> Teresa Ramos<sup>a</sup>  
and J. Carlos Menéndez<sup>a\*</sup>

<sup>a</sup> Departamento de Química Orgánica and Farmacéutica, Facultad de Farmacia,  
Universidad Complutense, 28040 Madrid, Spain. Fax: 34 91 3941822; Tel: 34 91  
3941840; E-mail: josecm@farm.ucm.es

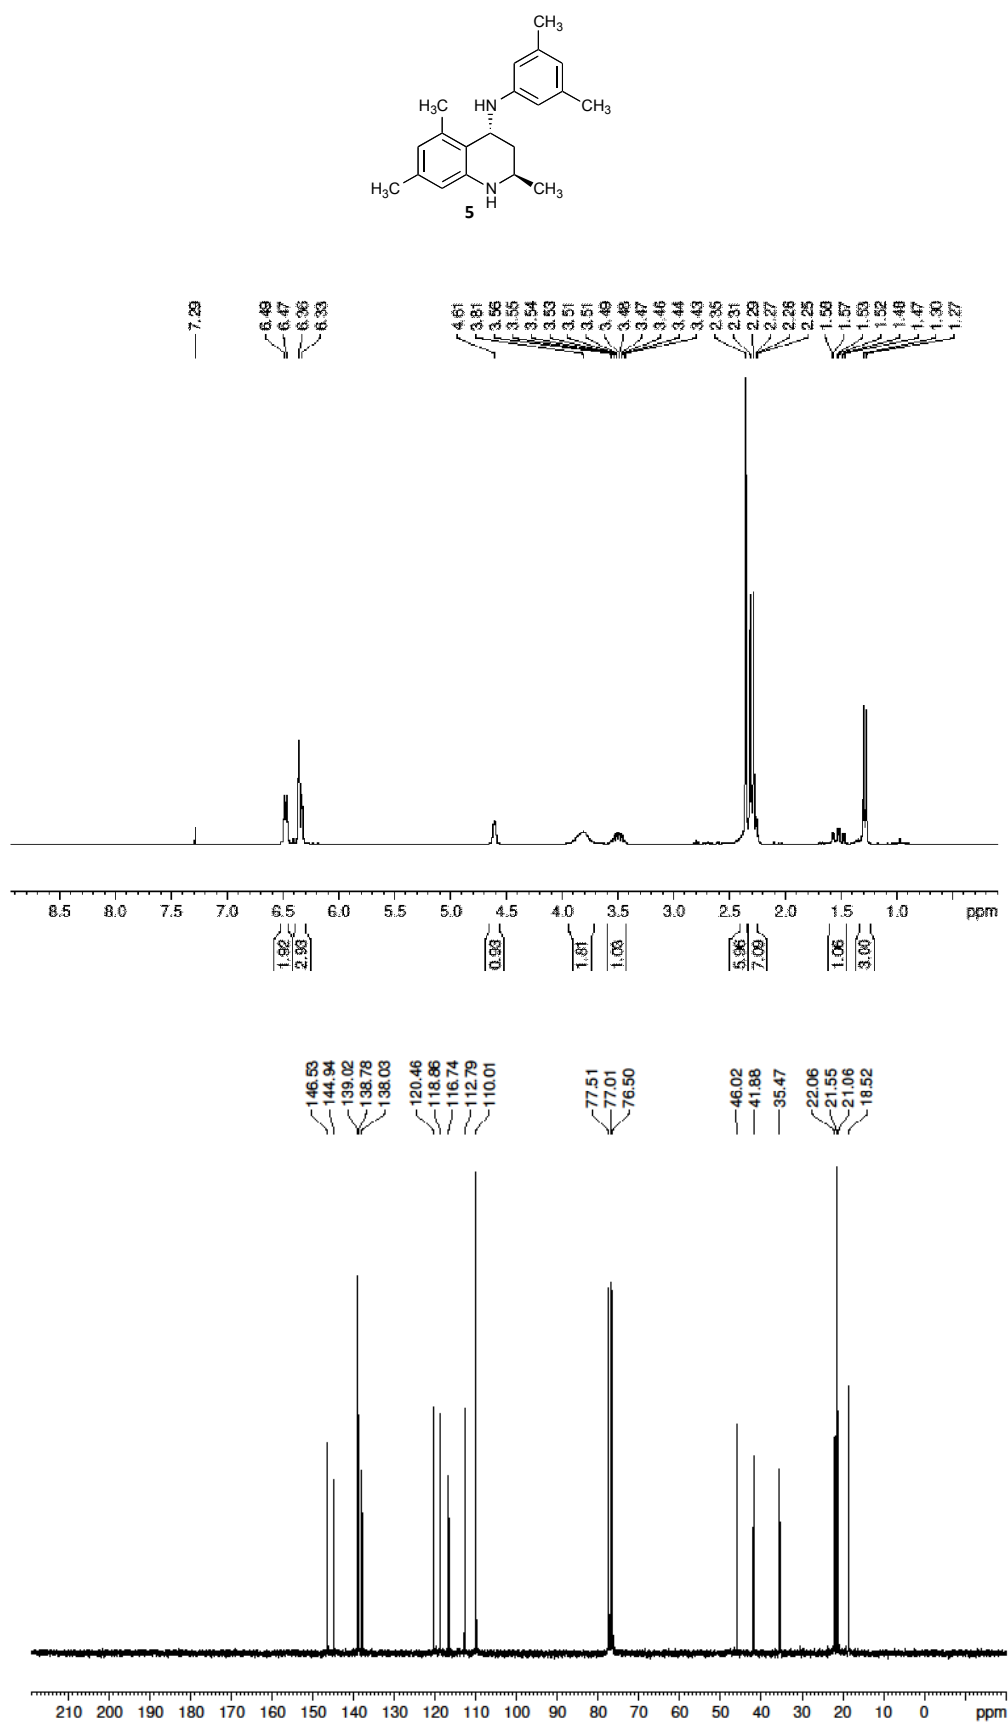

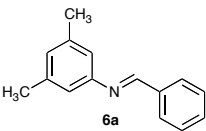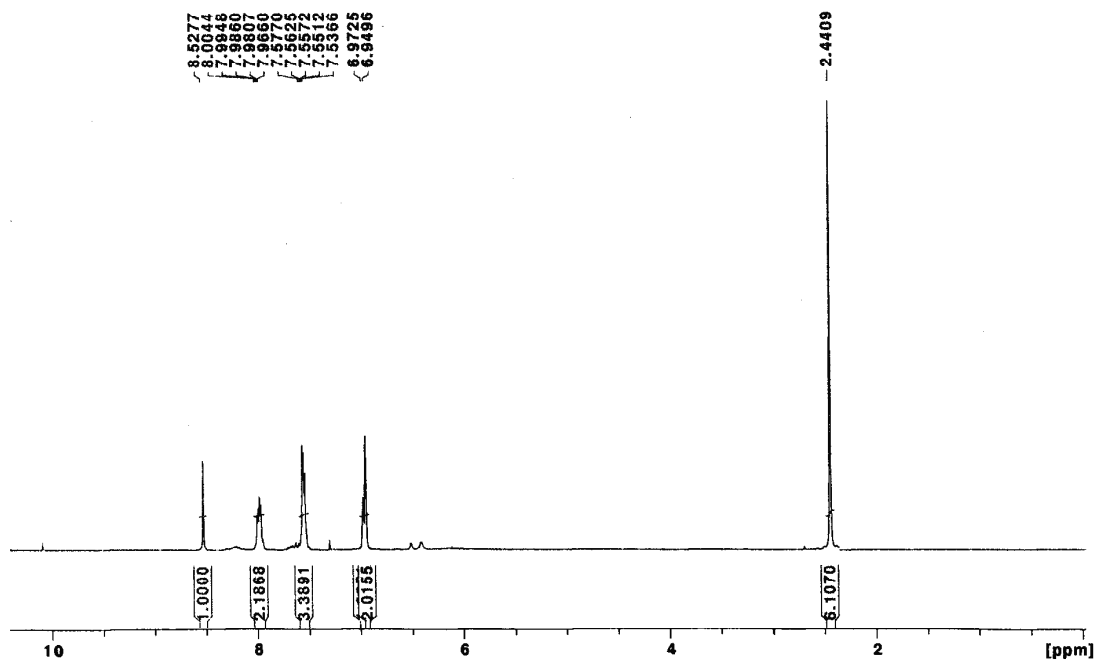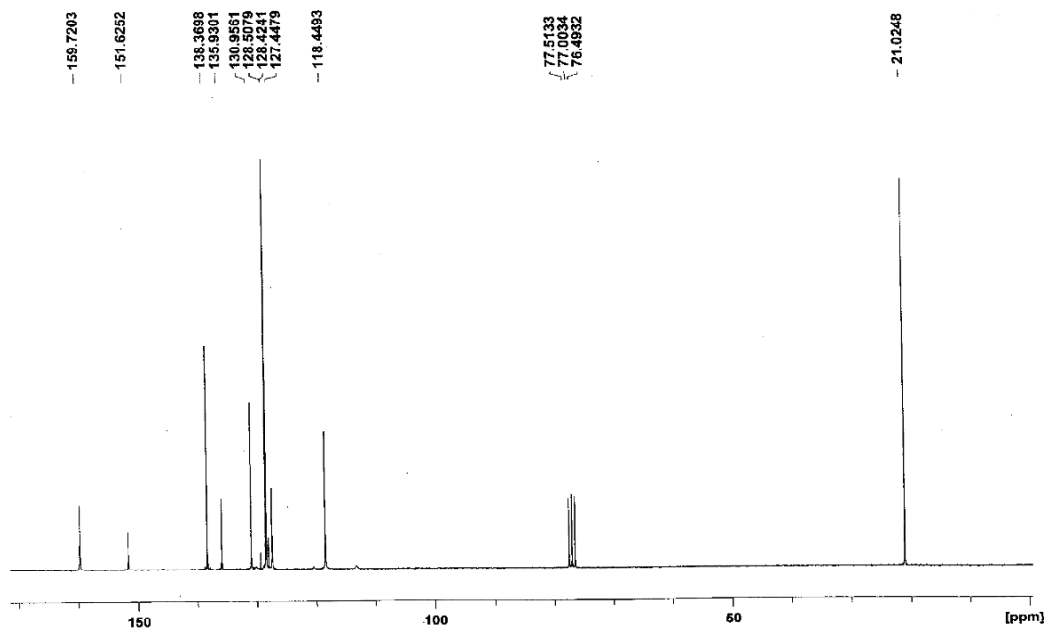

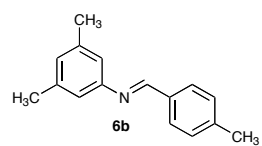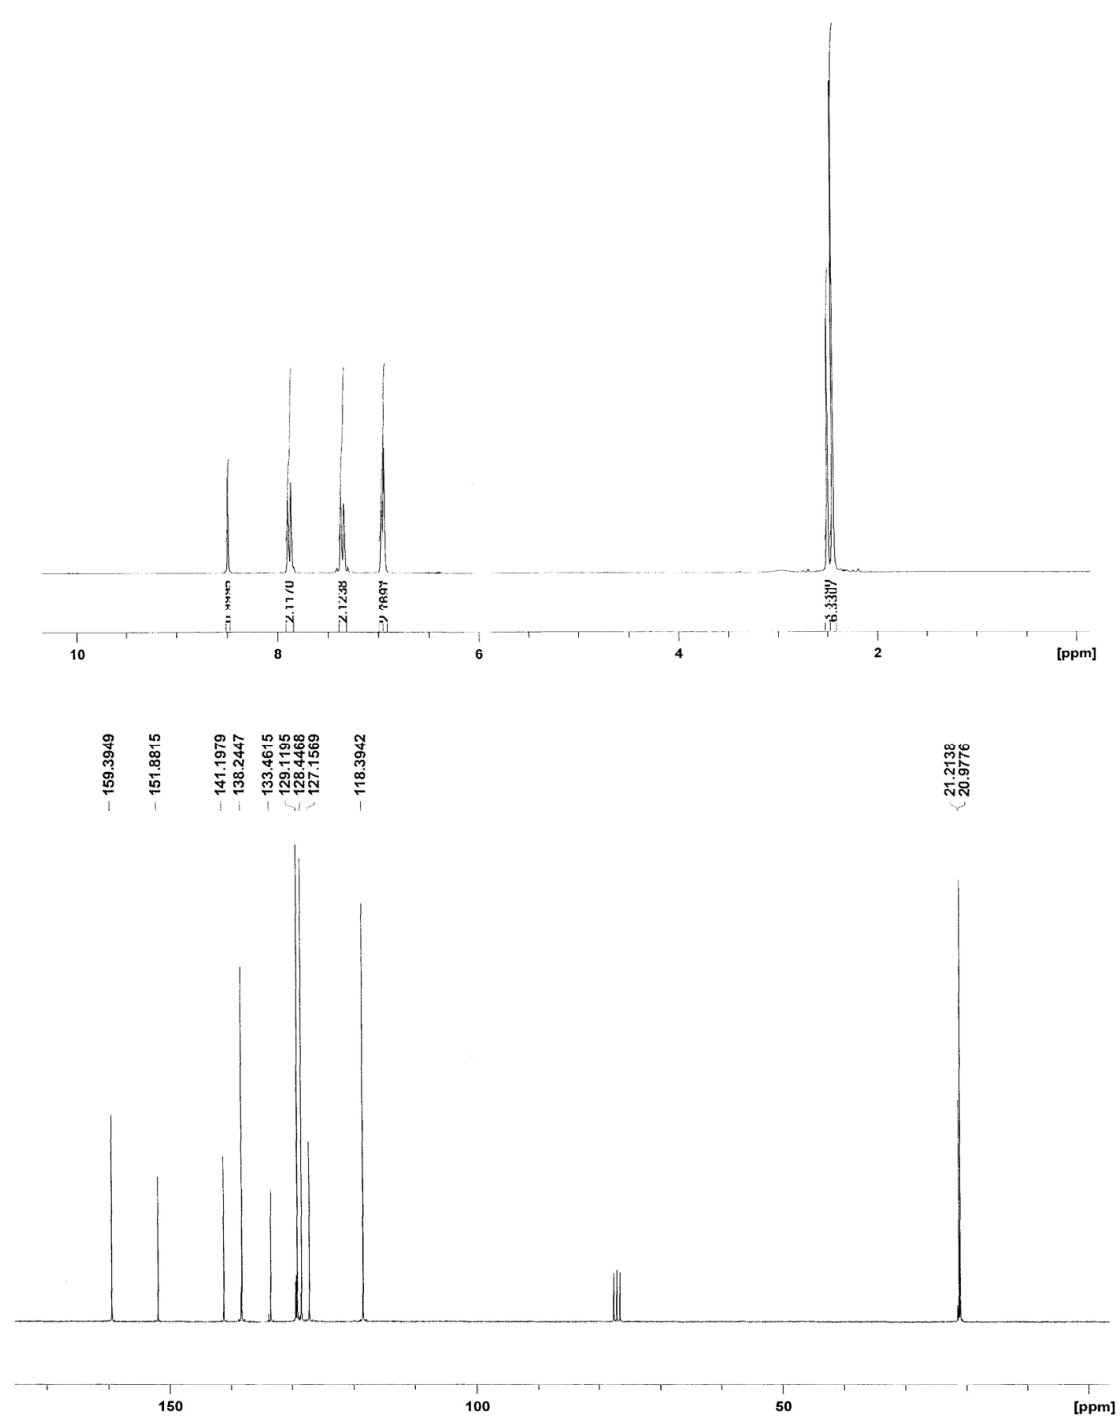

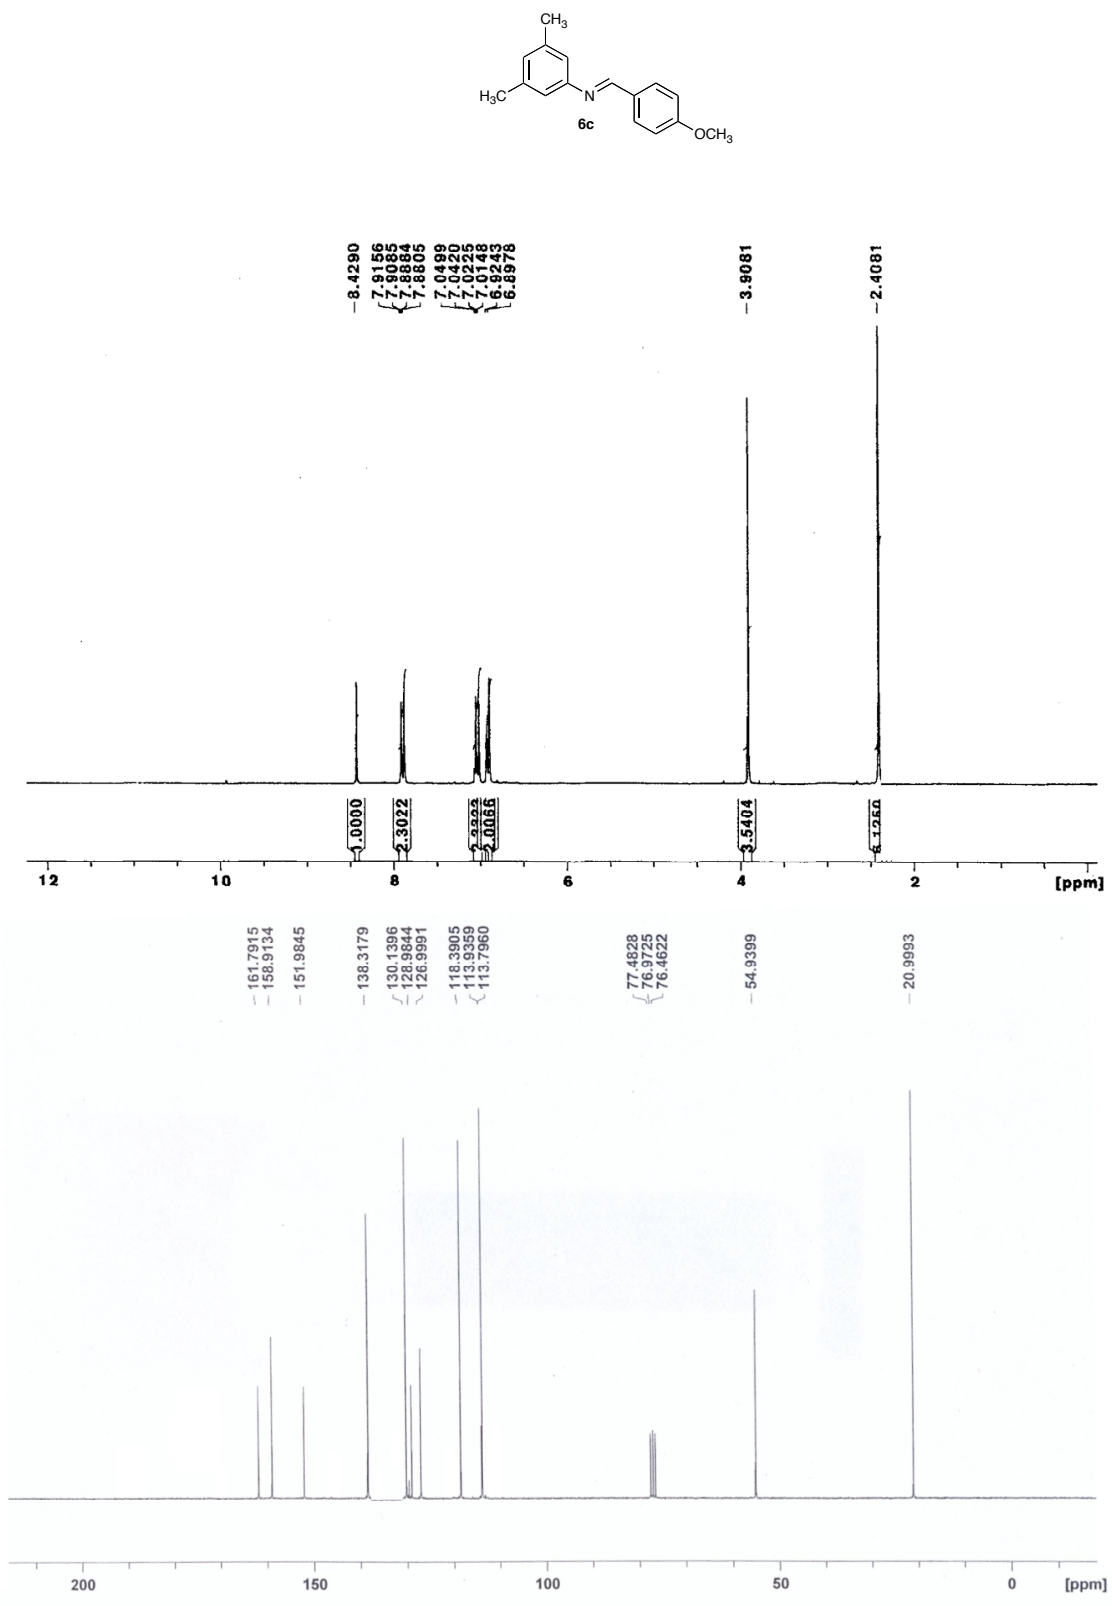

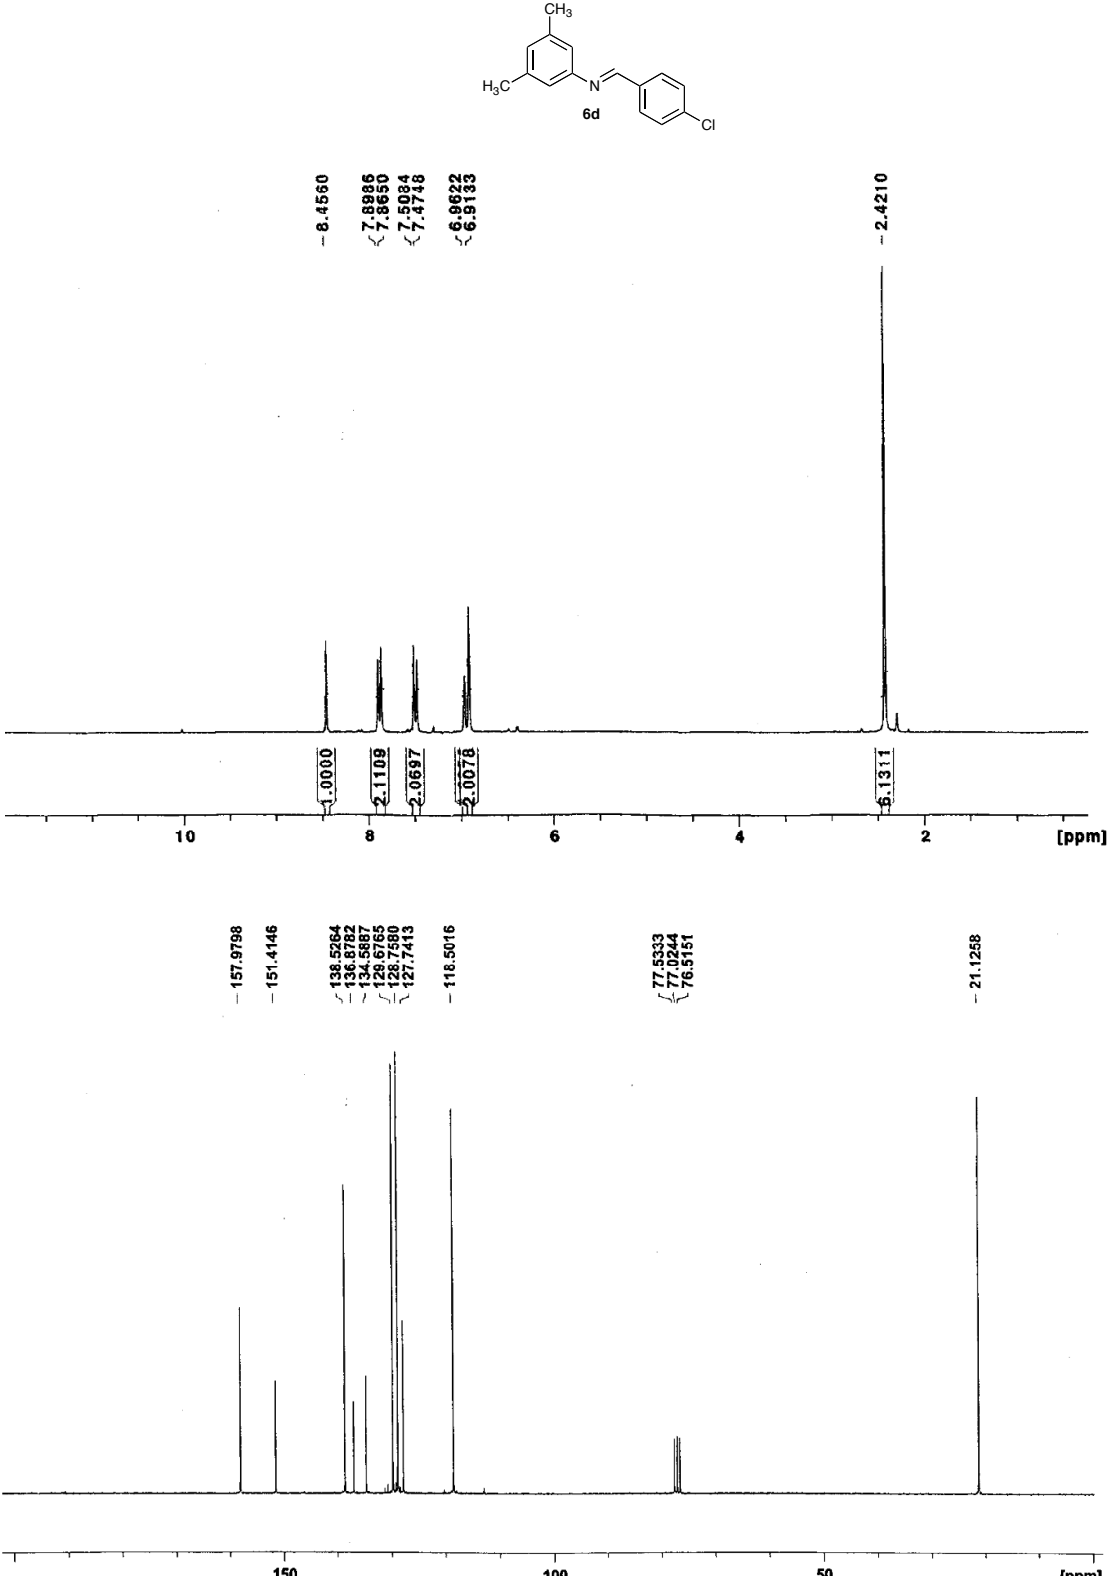

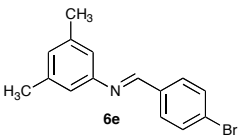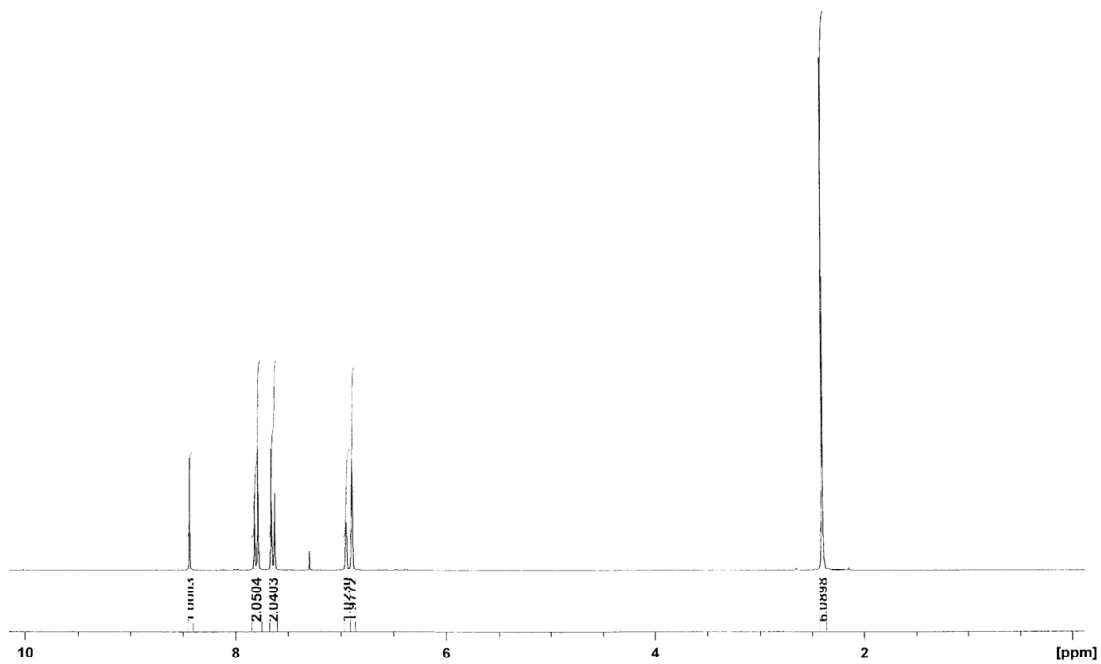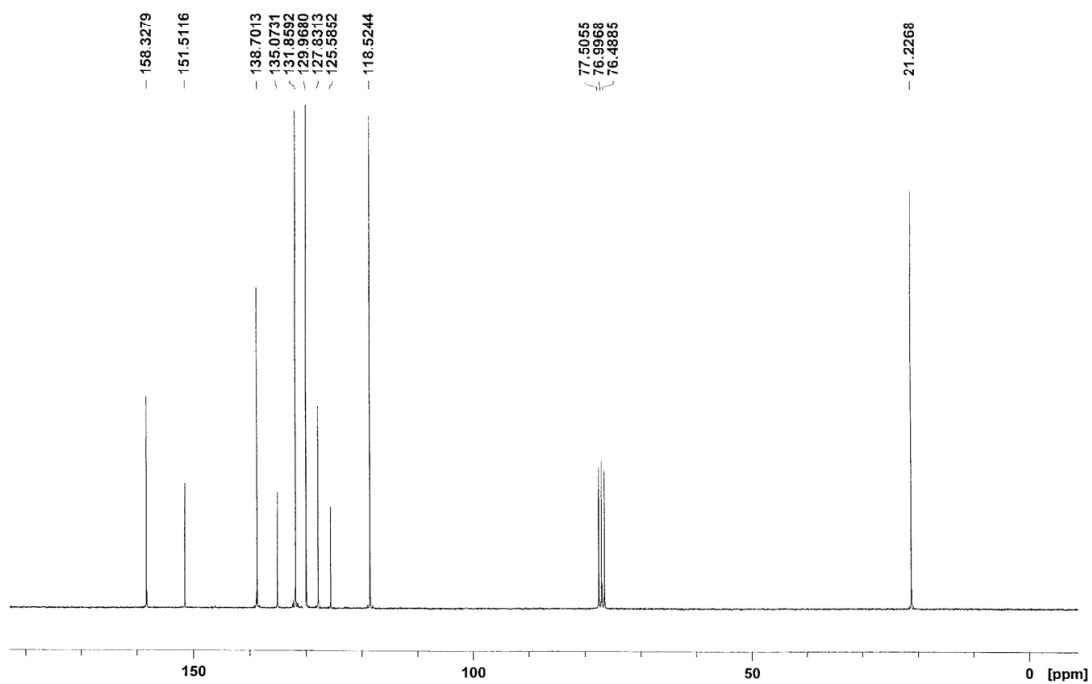

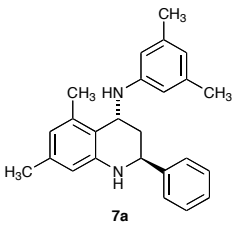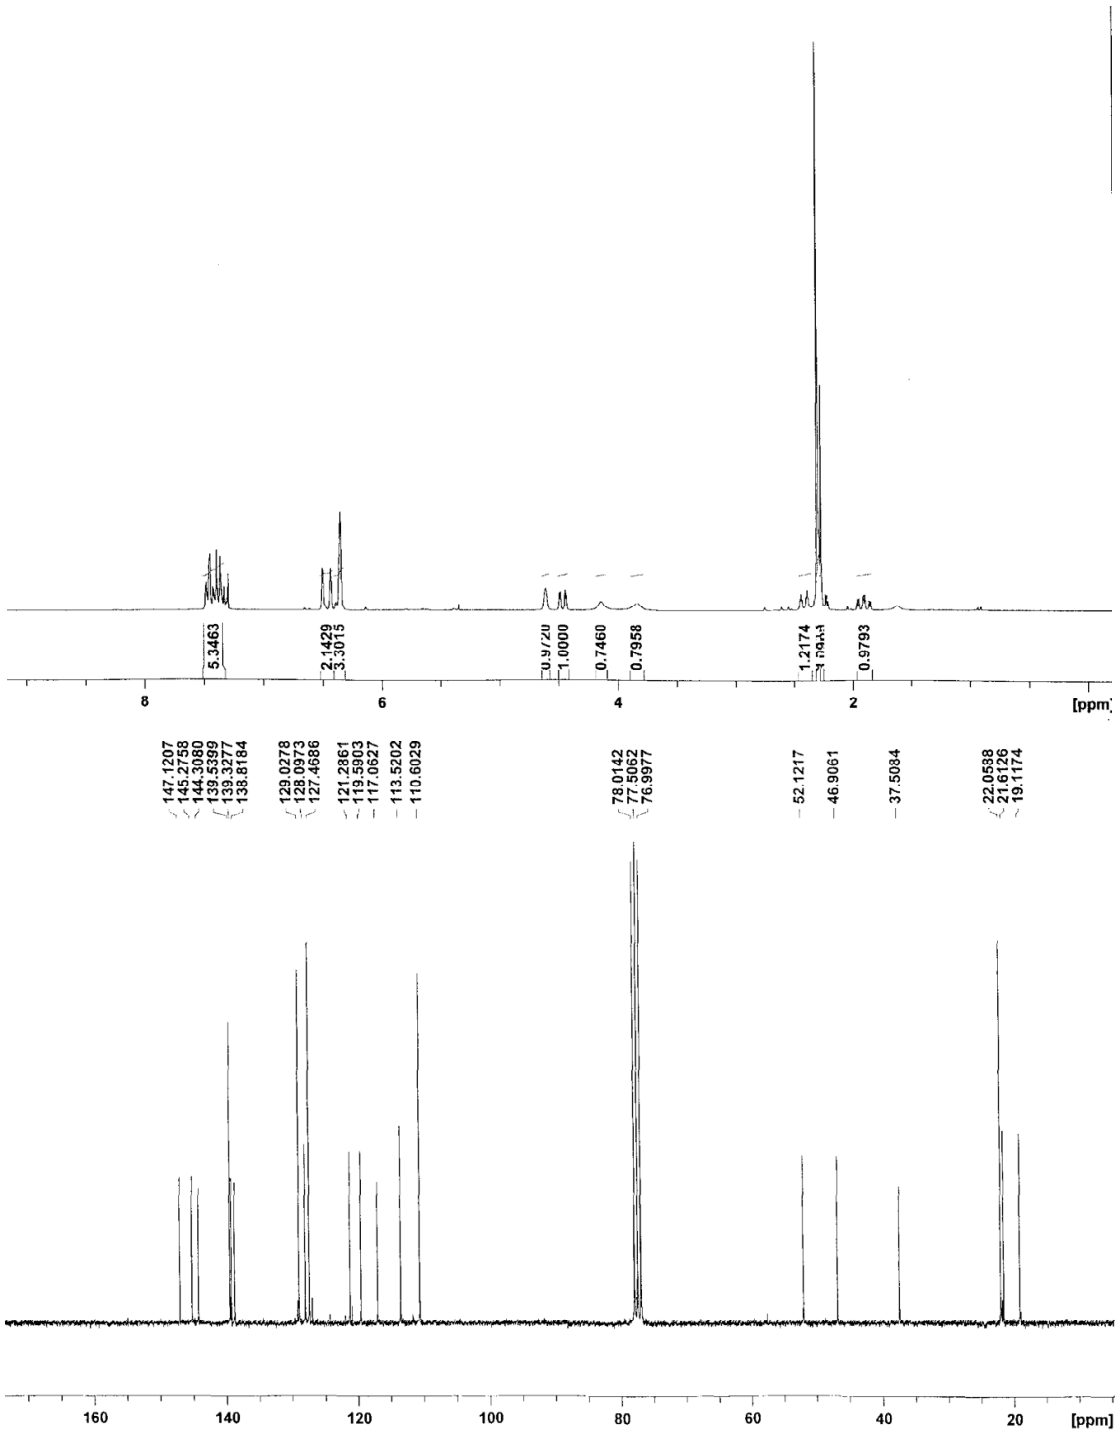



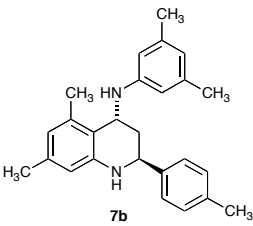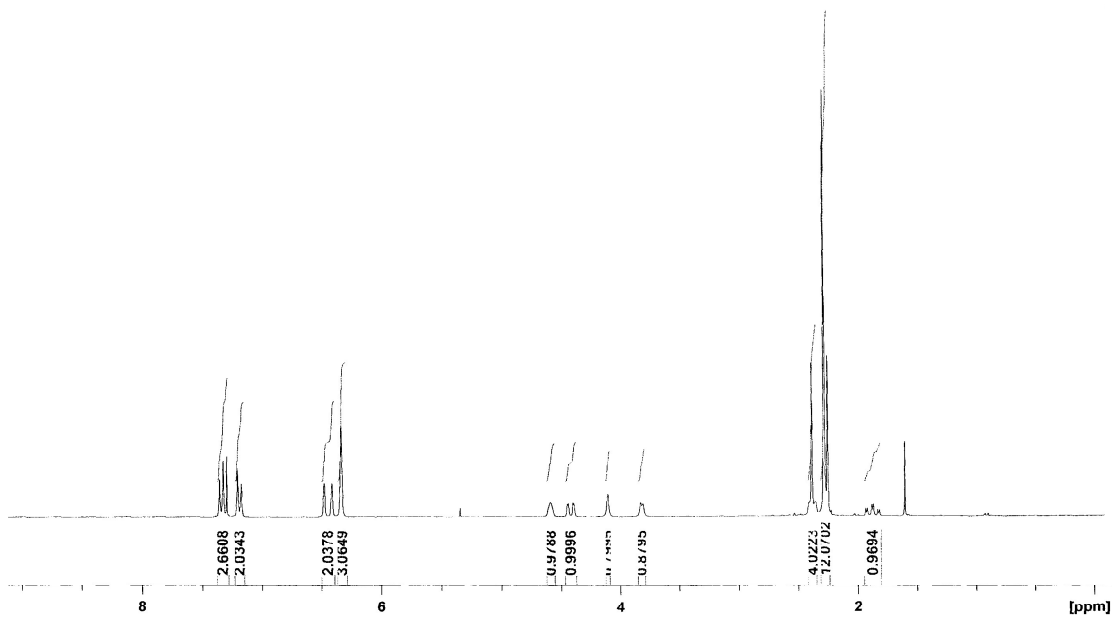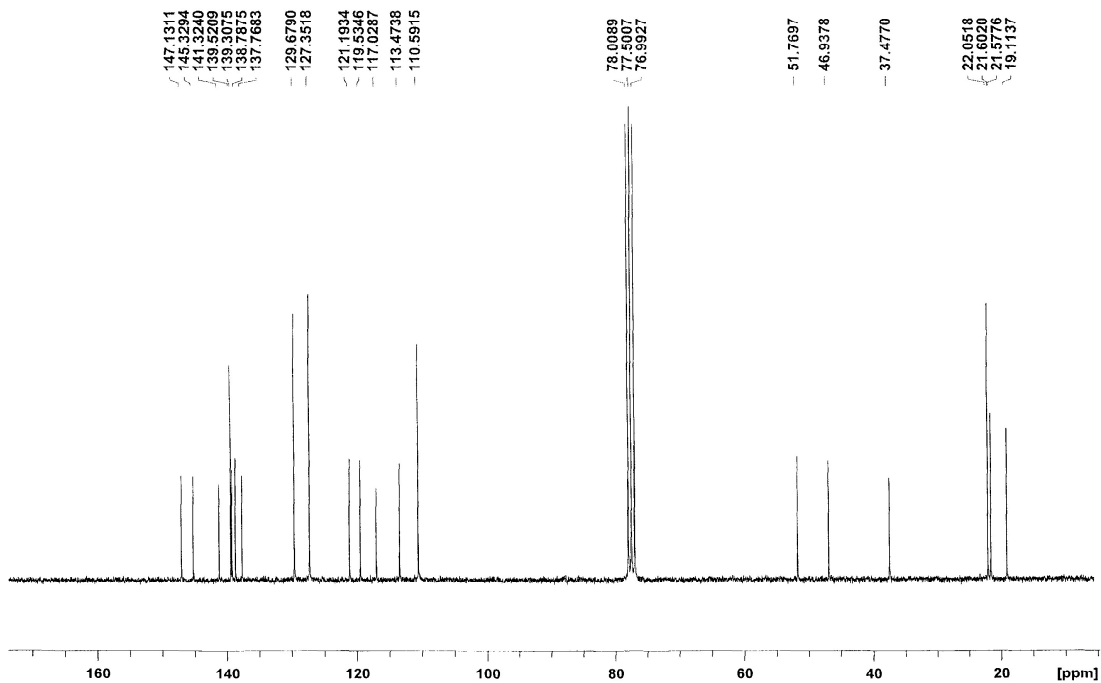

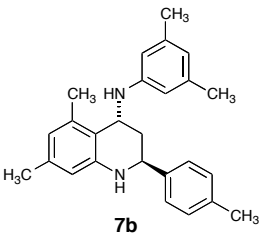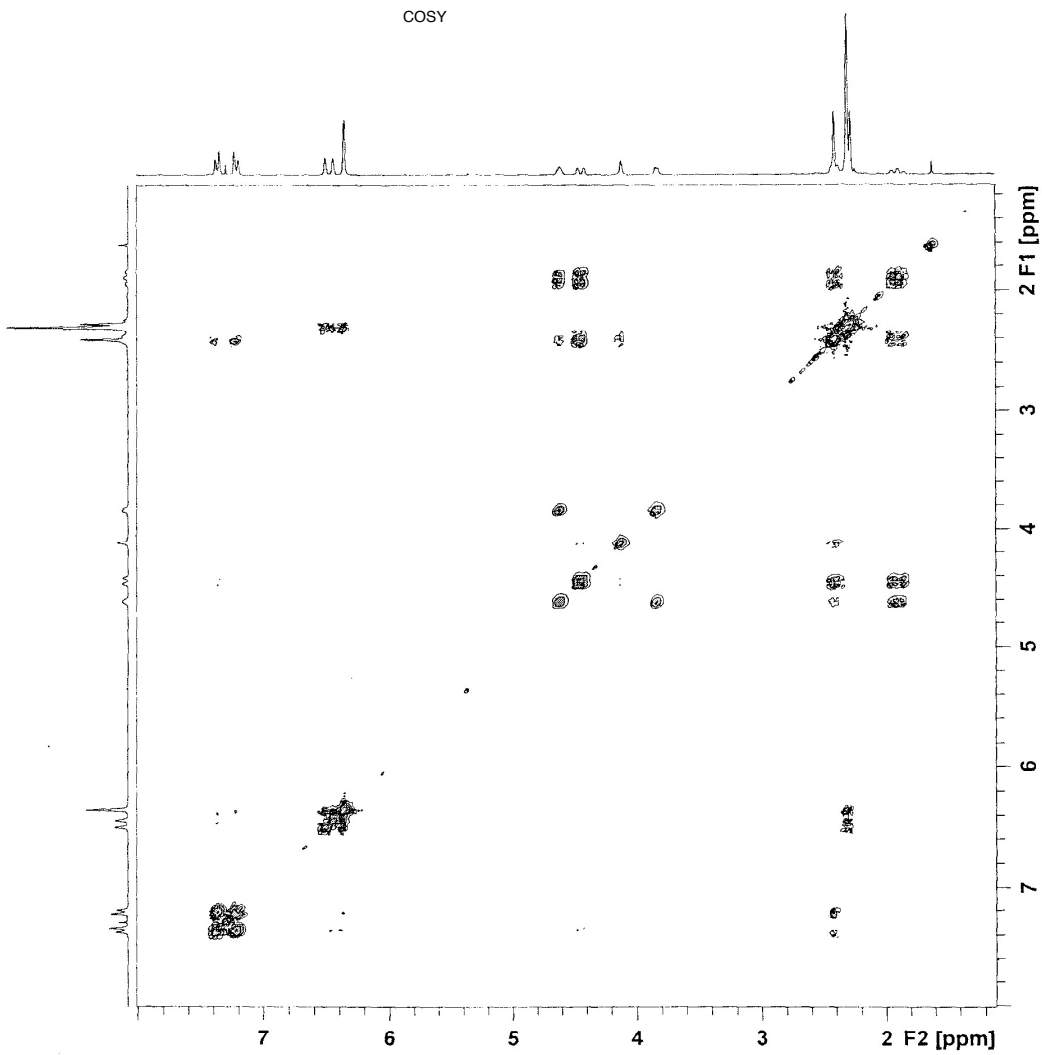

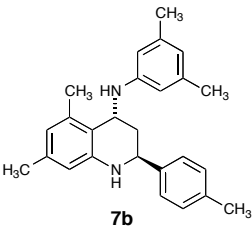

HMQC

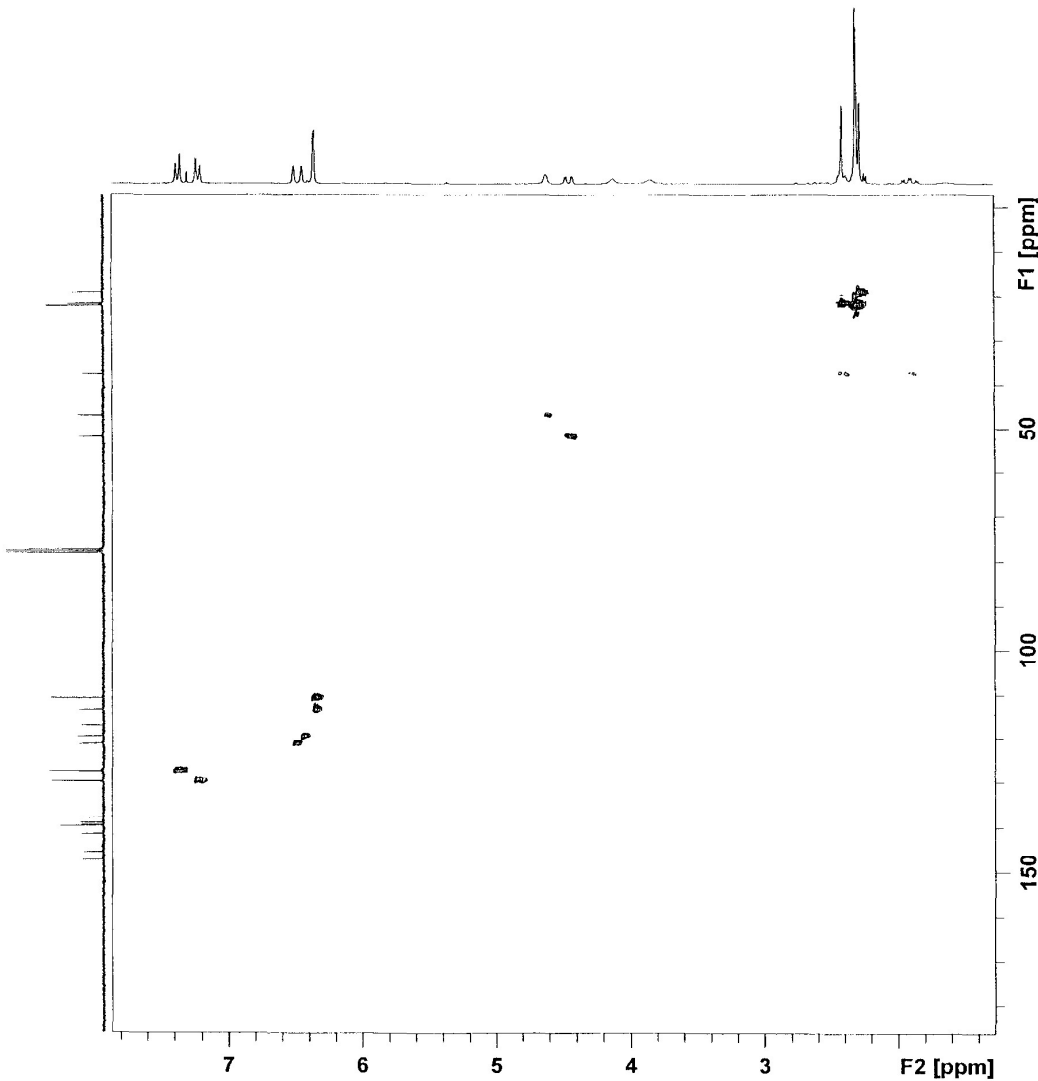

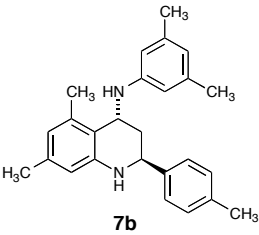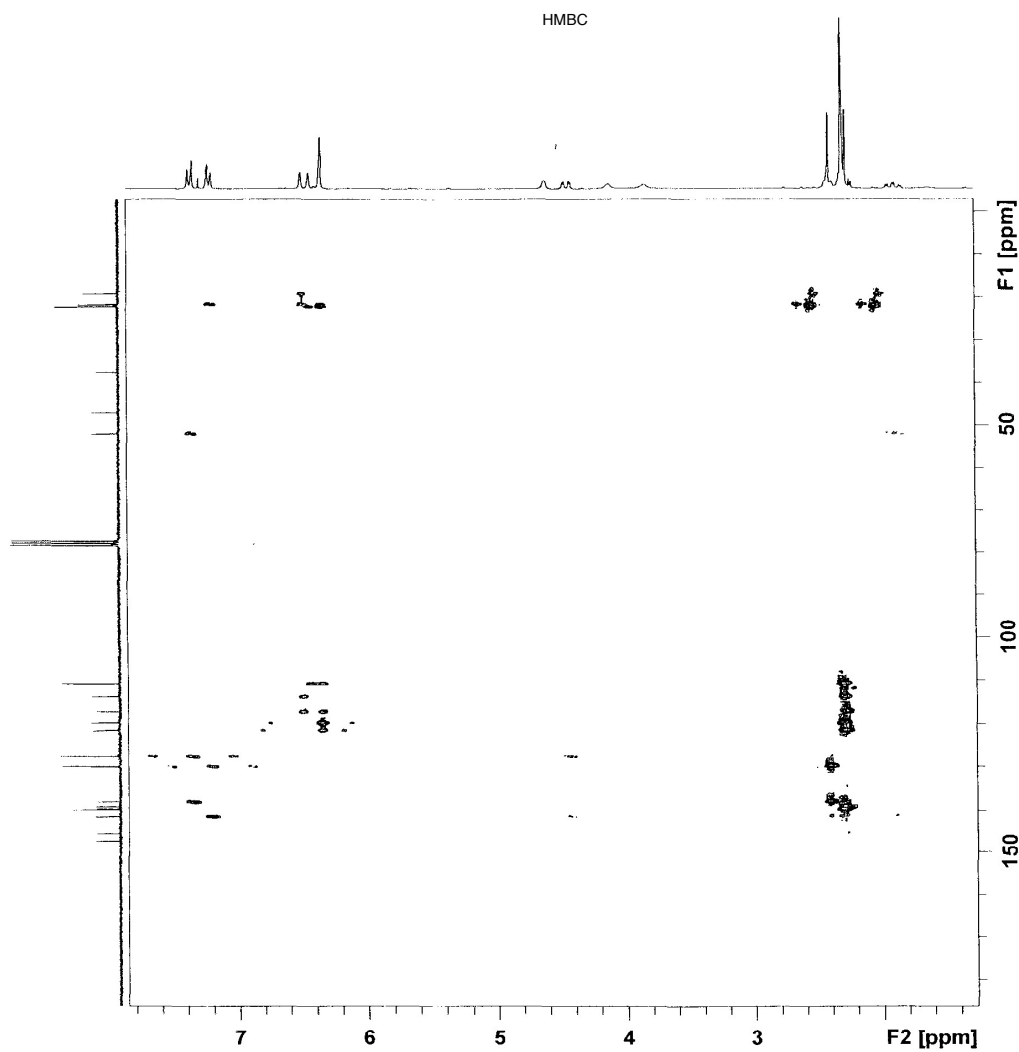

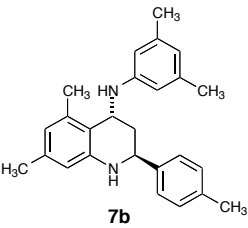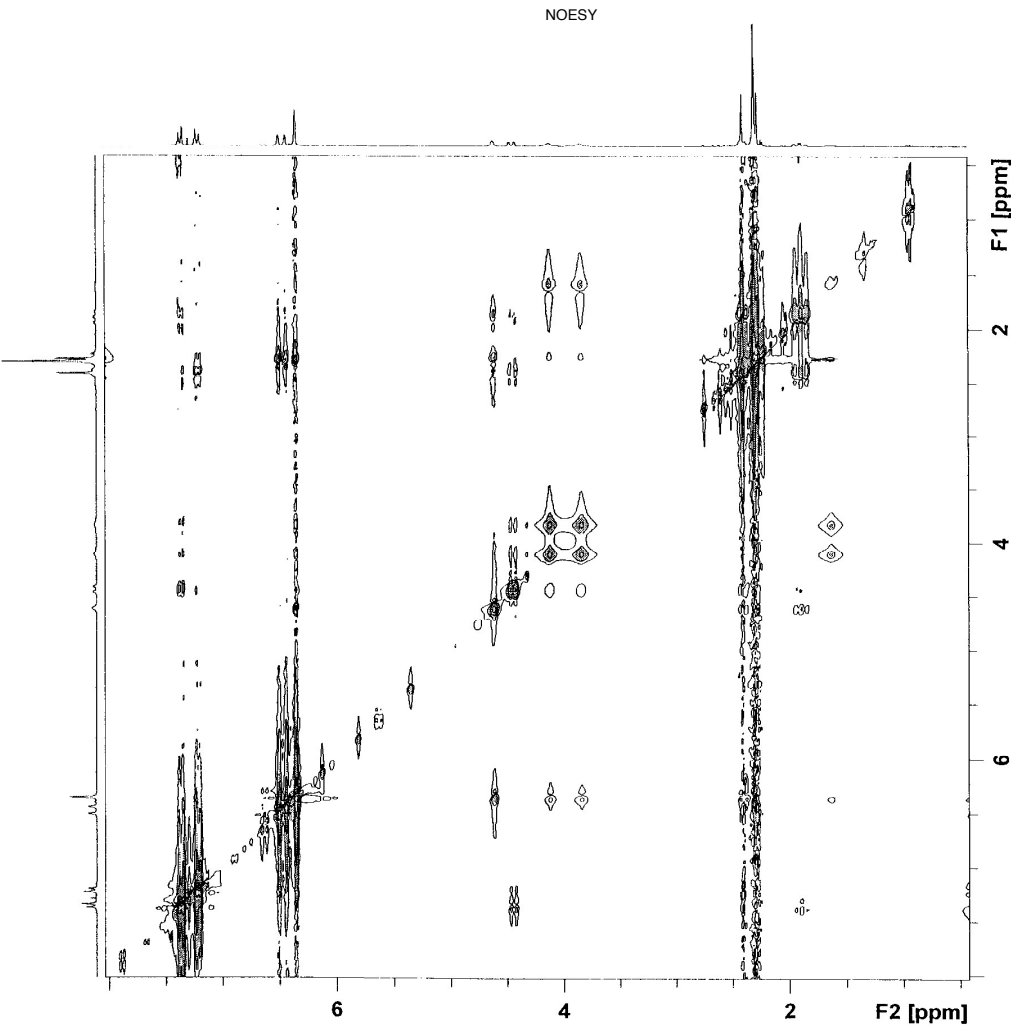

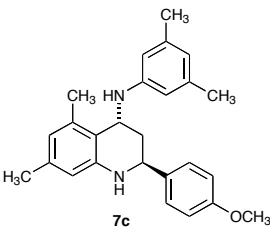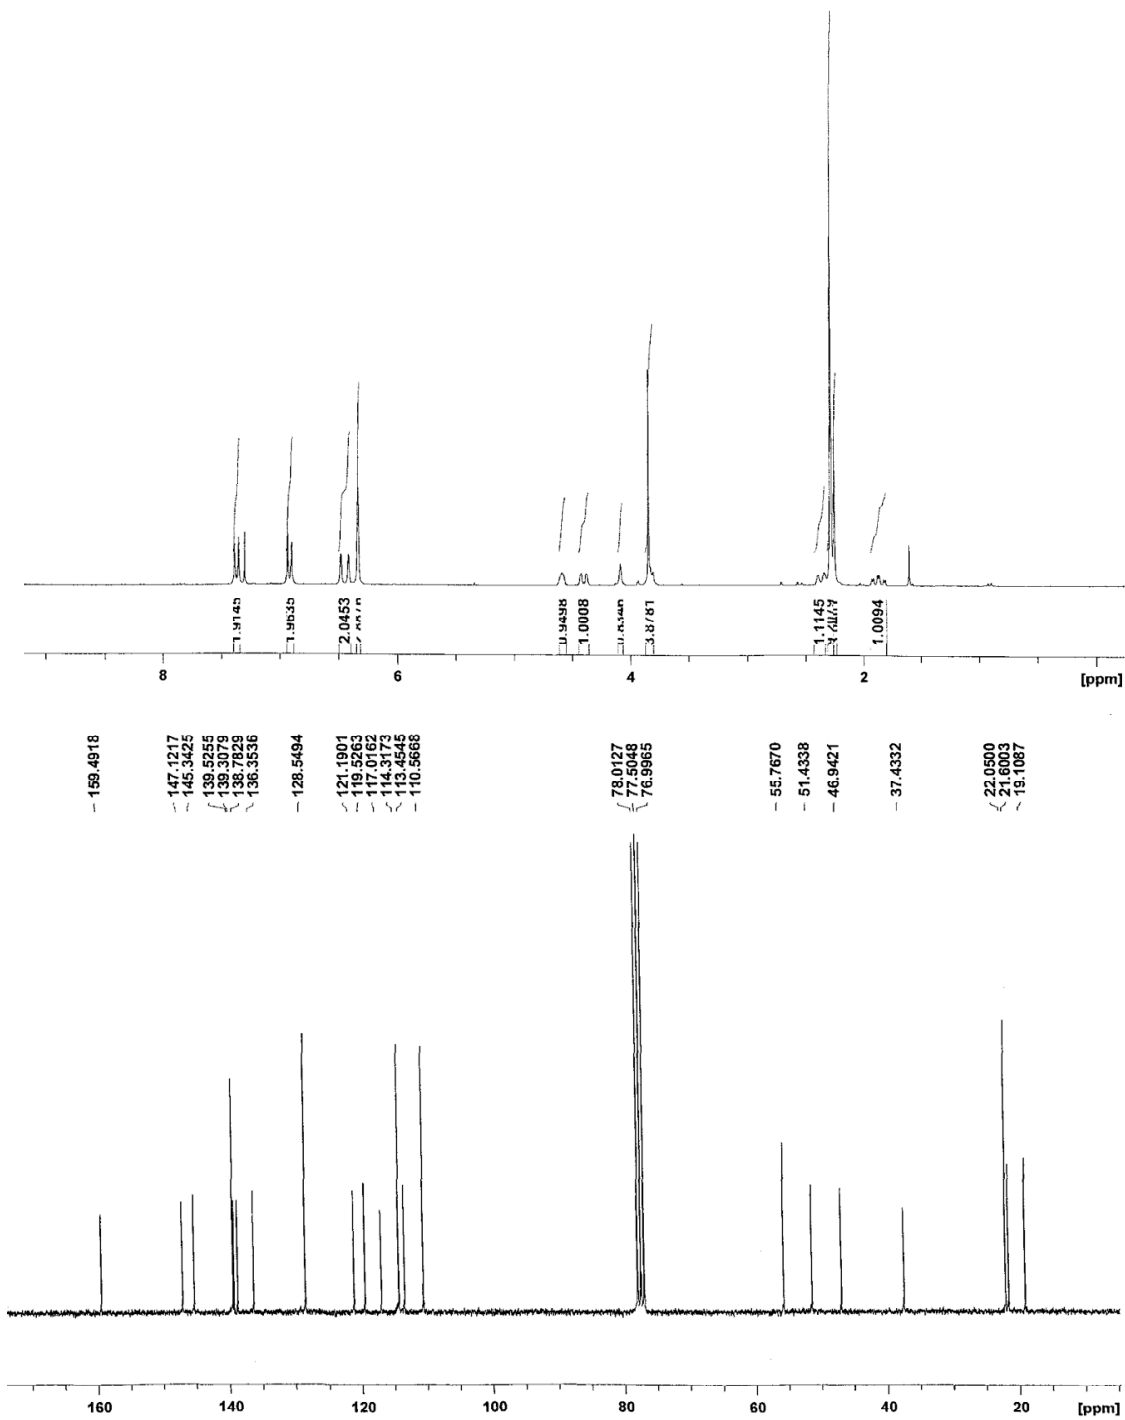

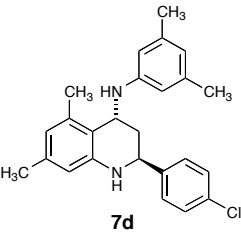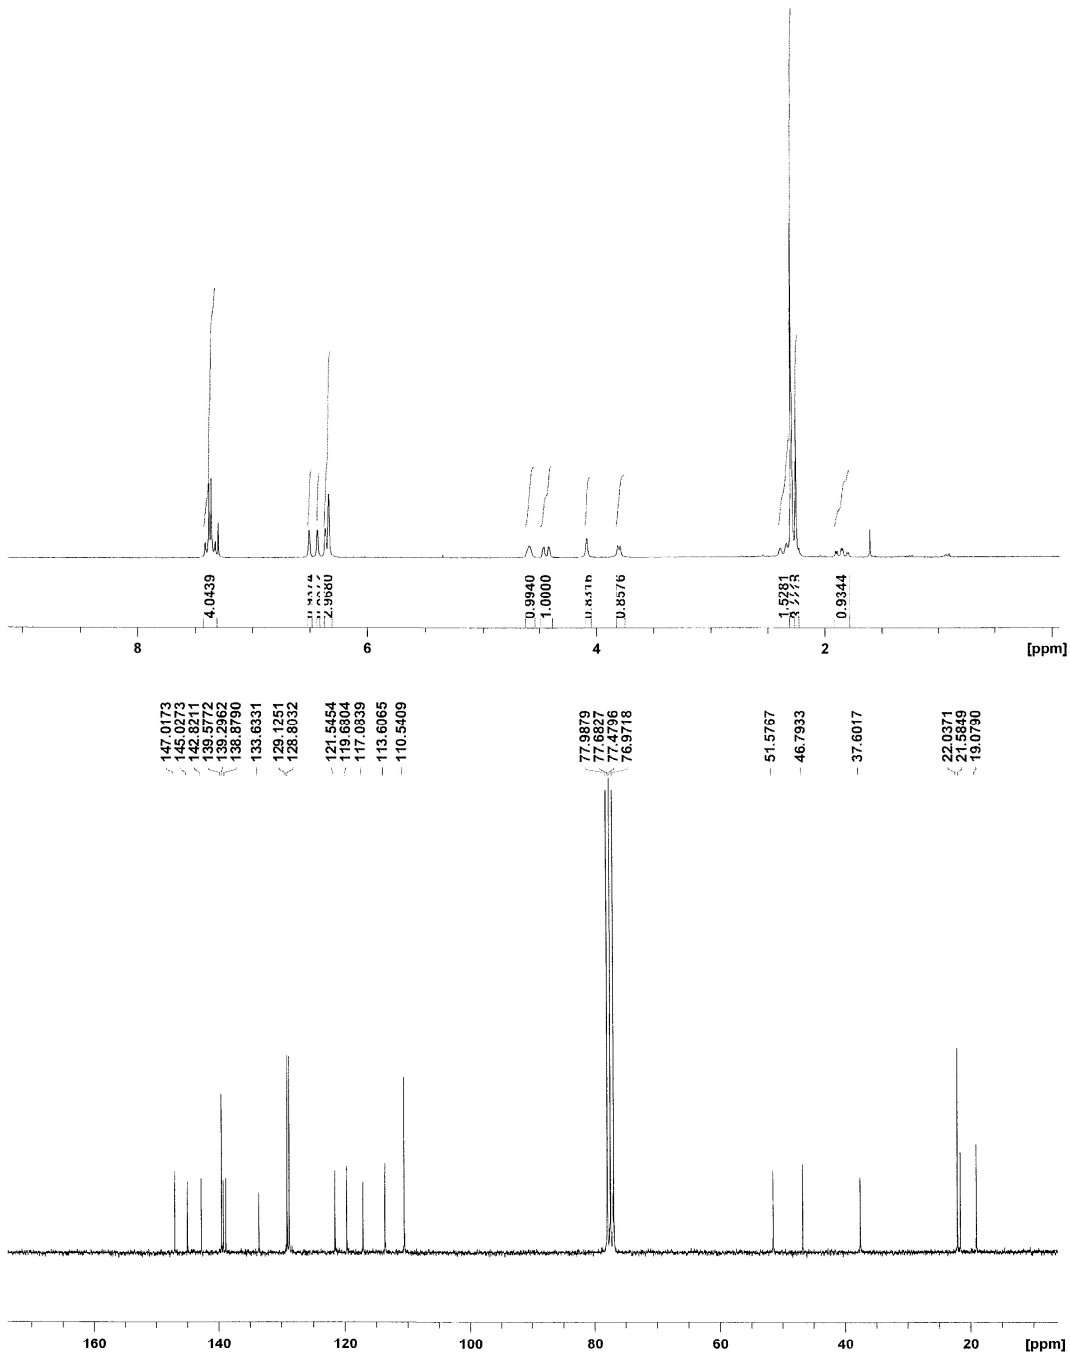

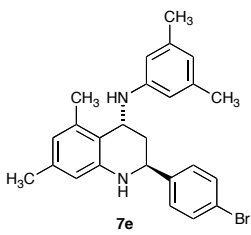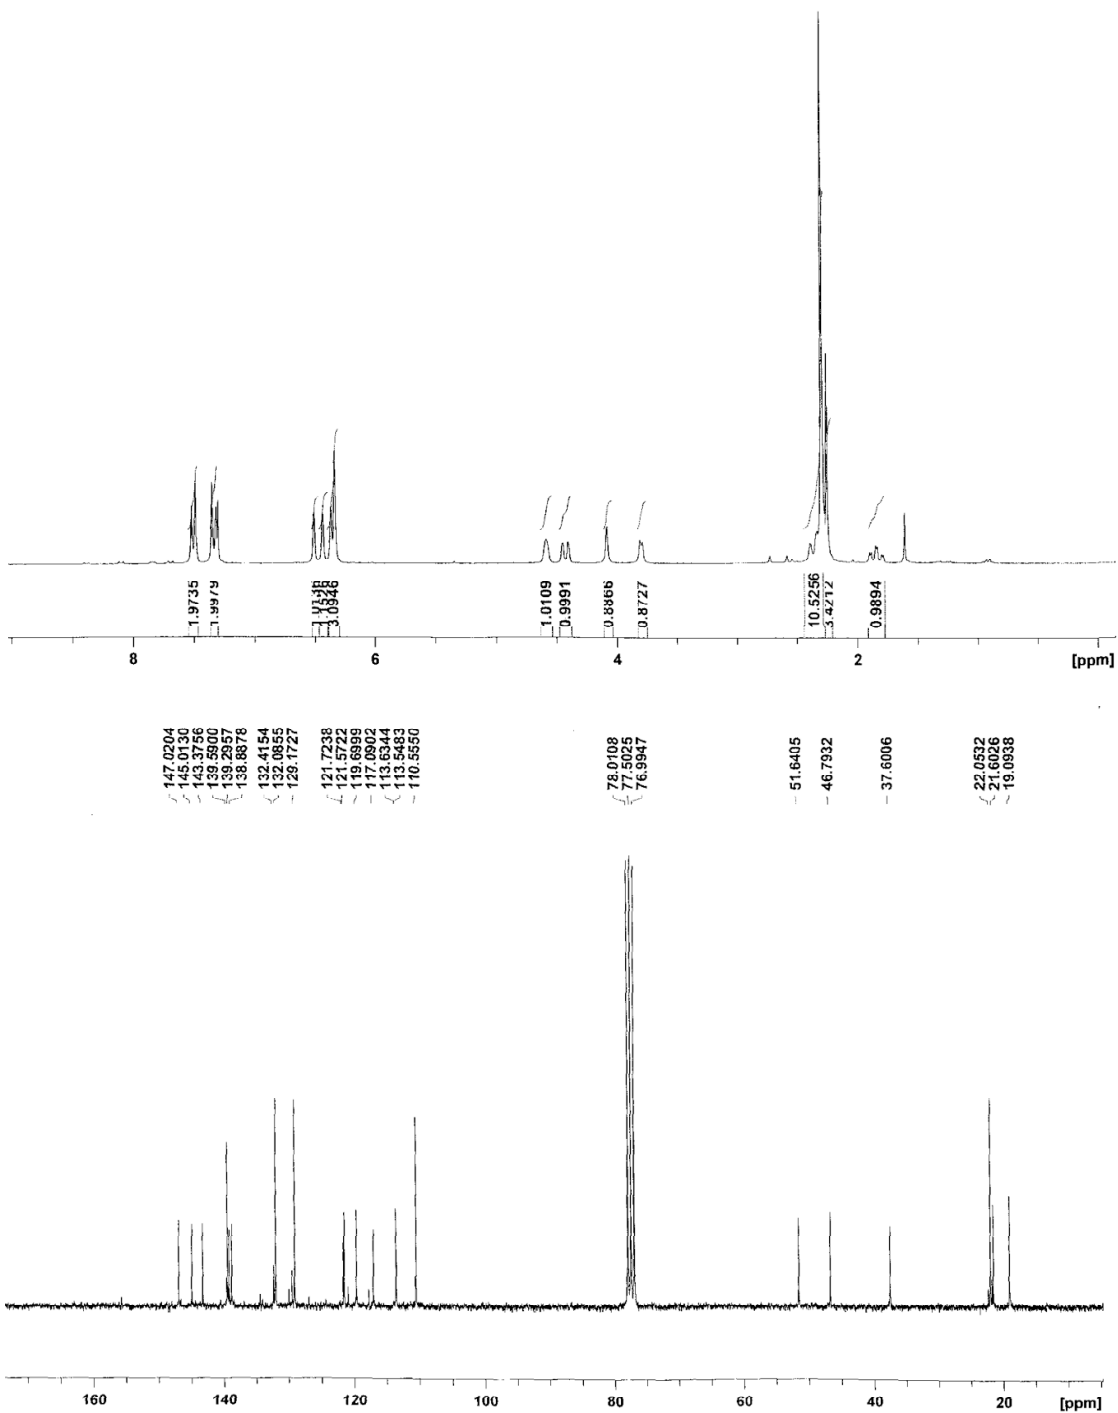



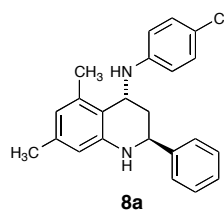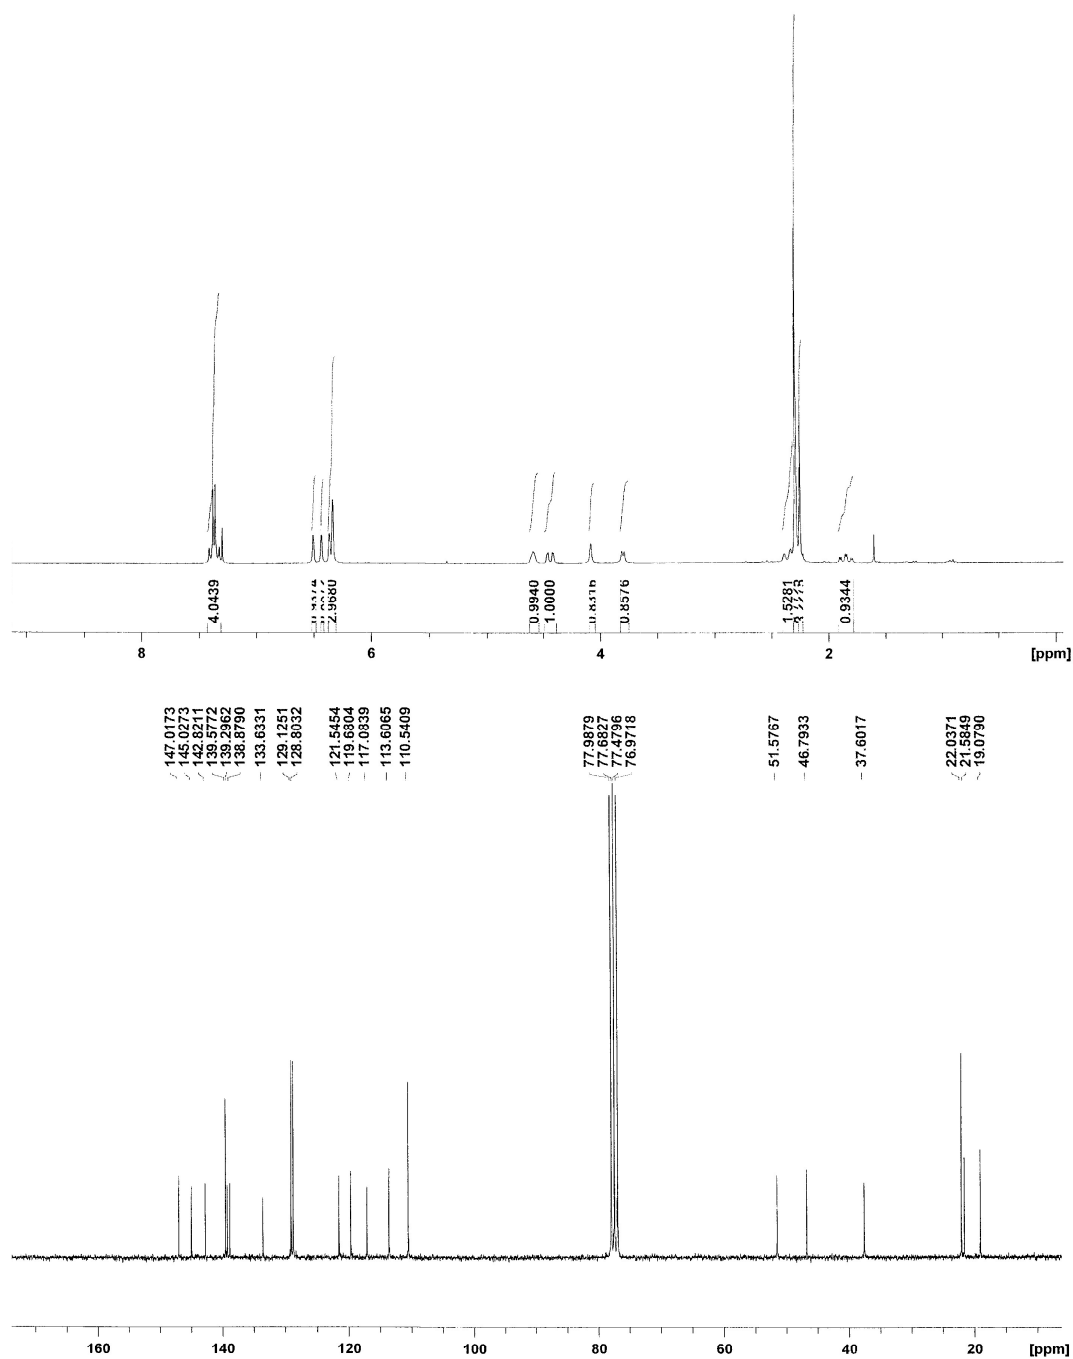

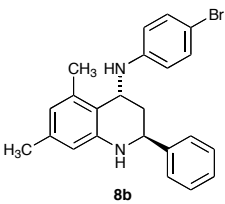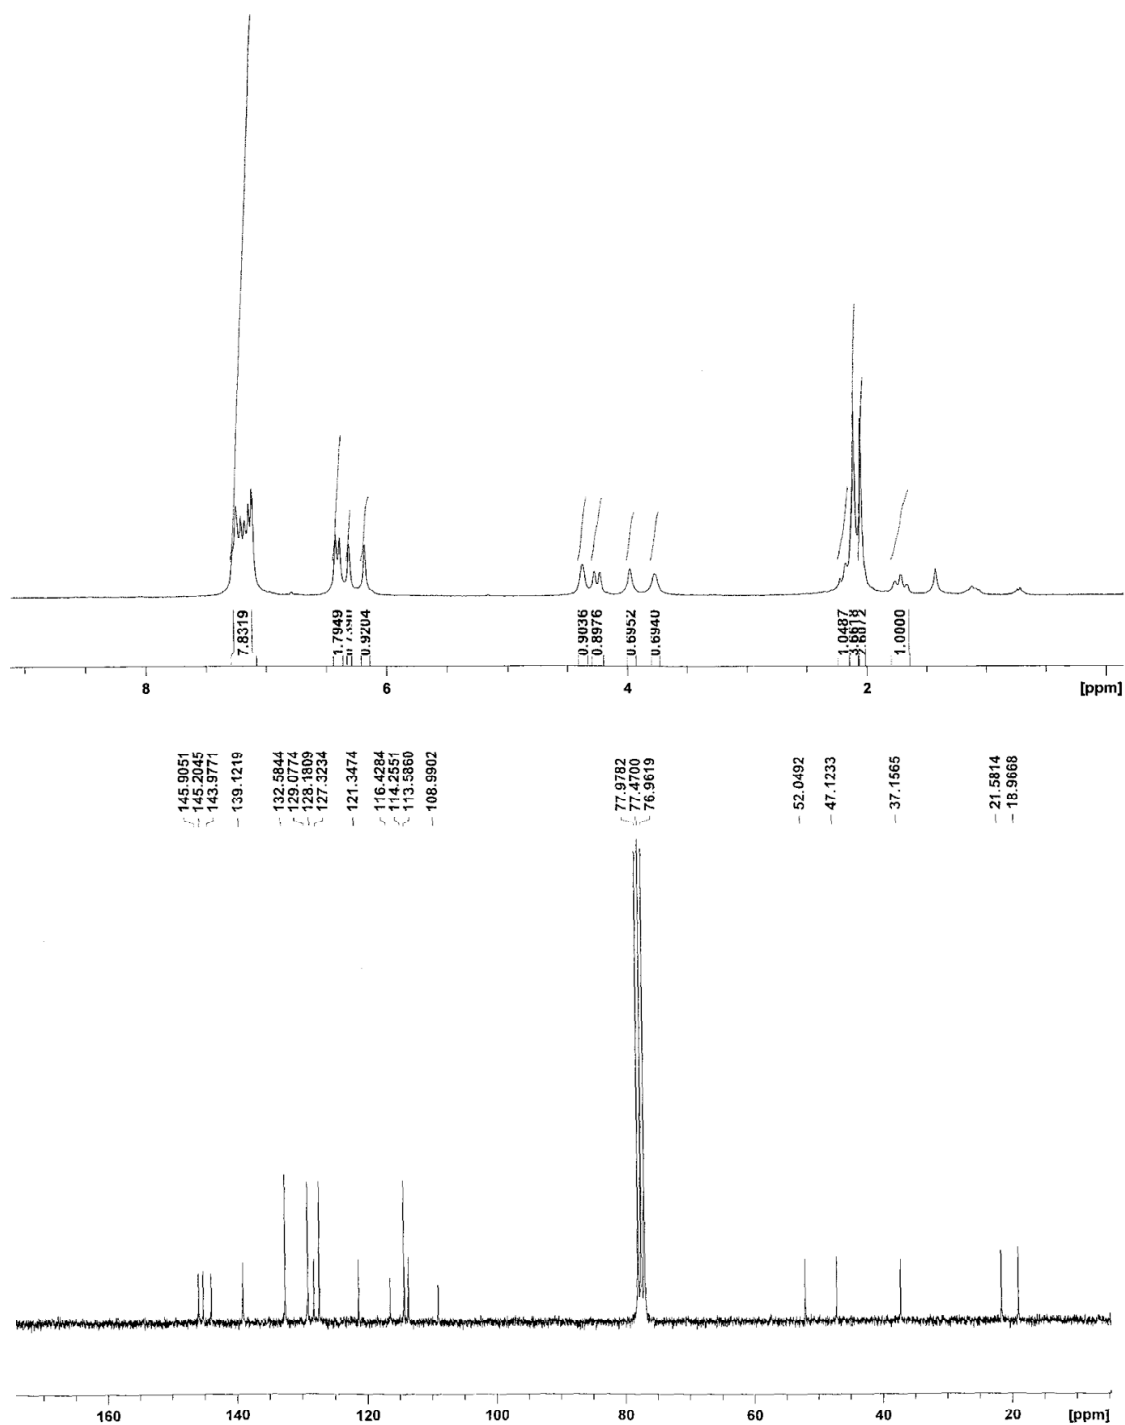

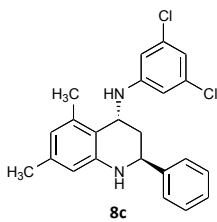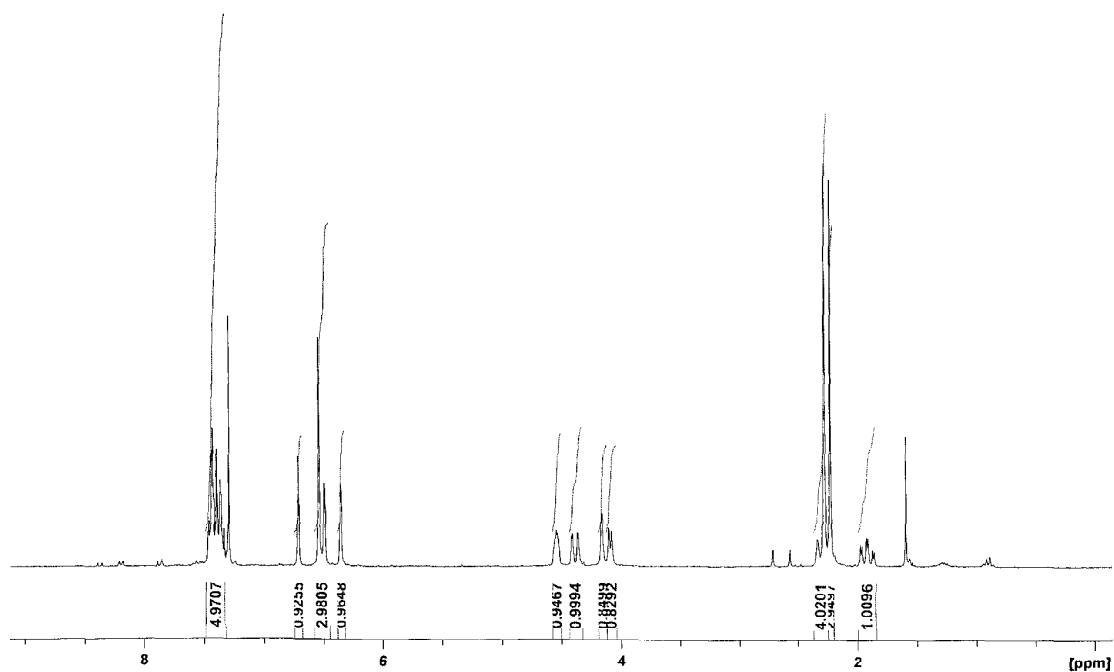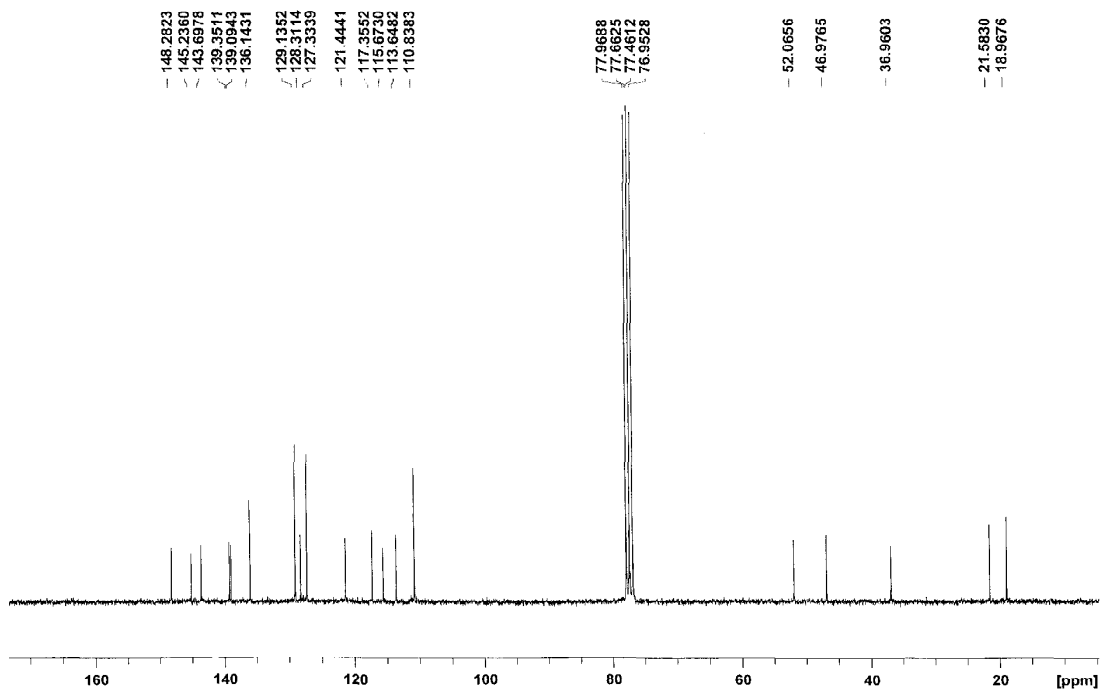

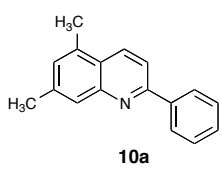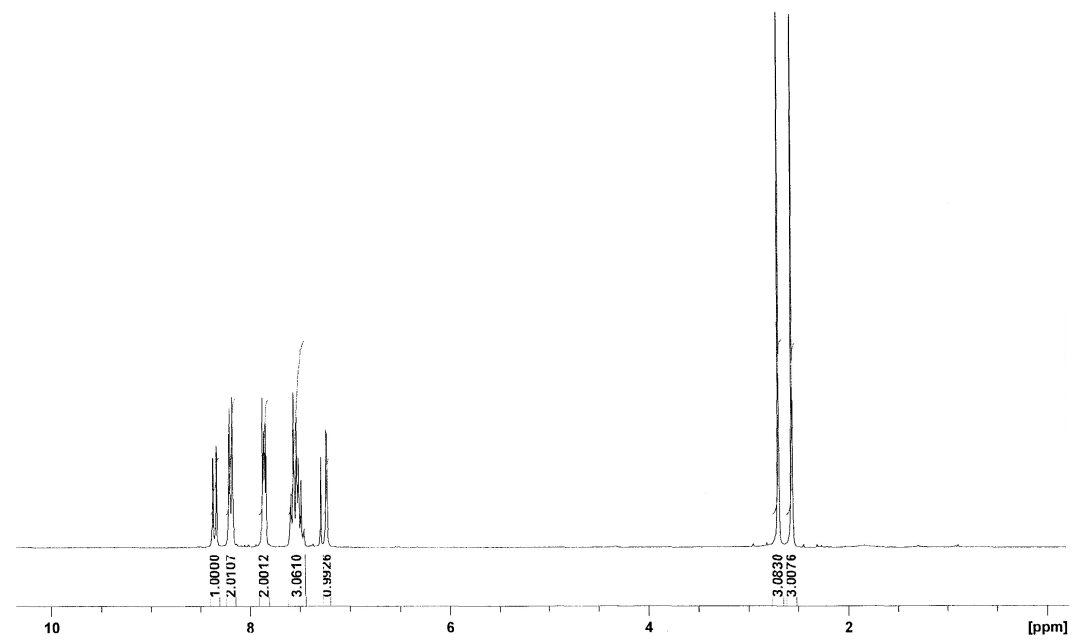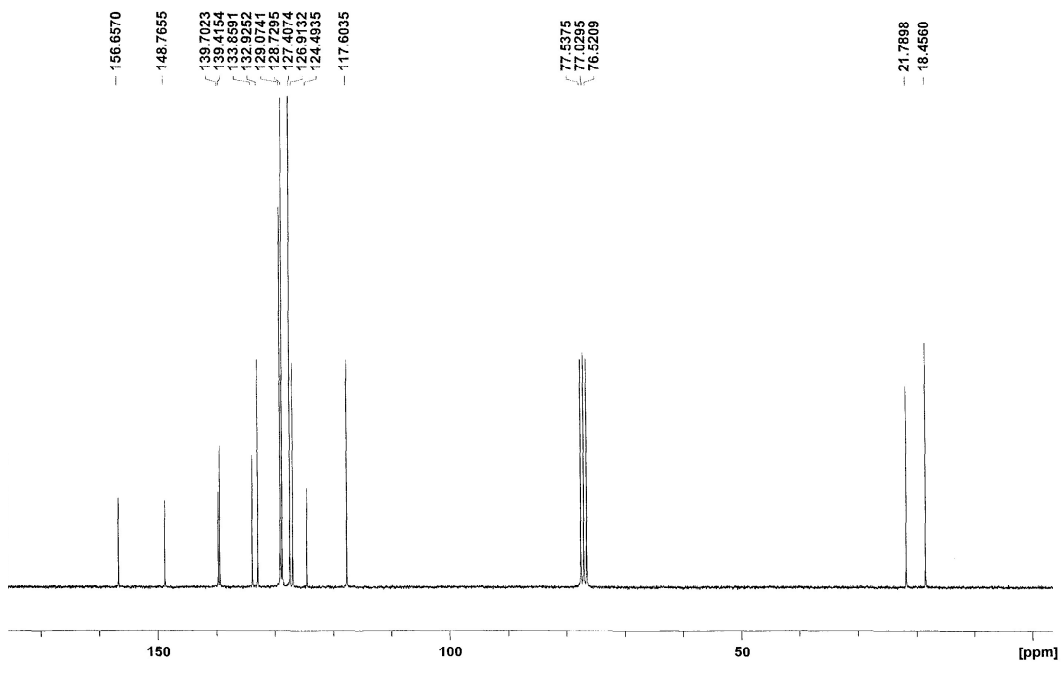

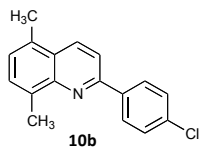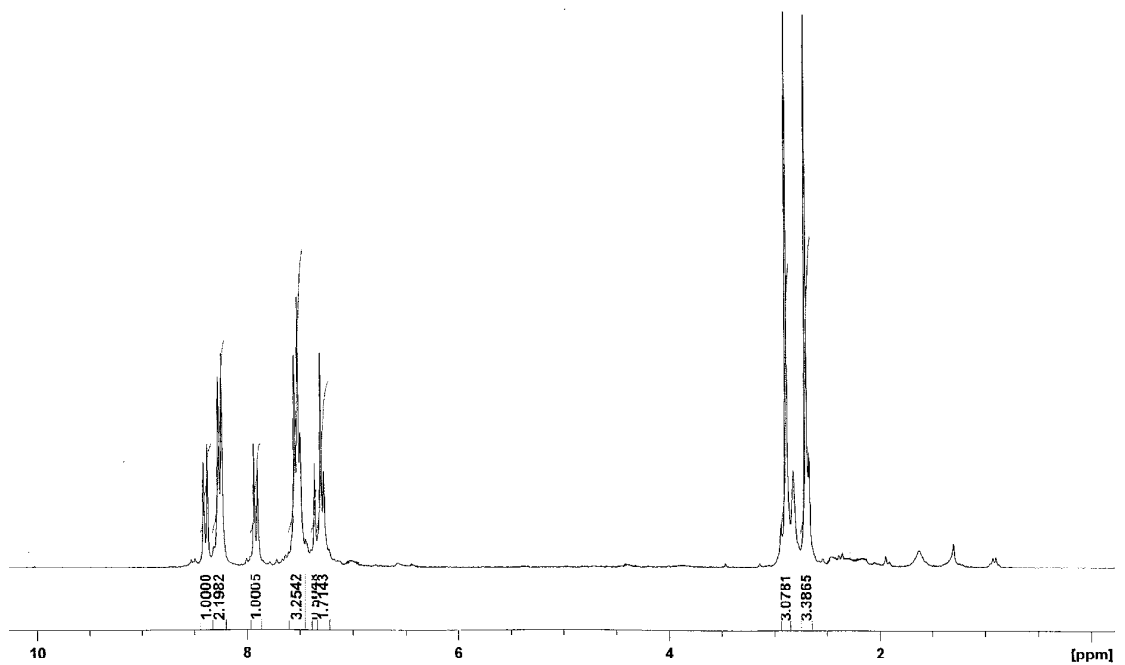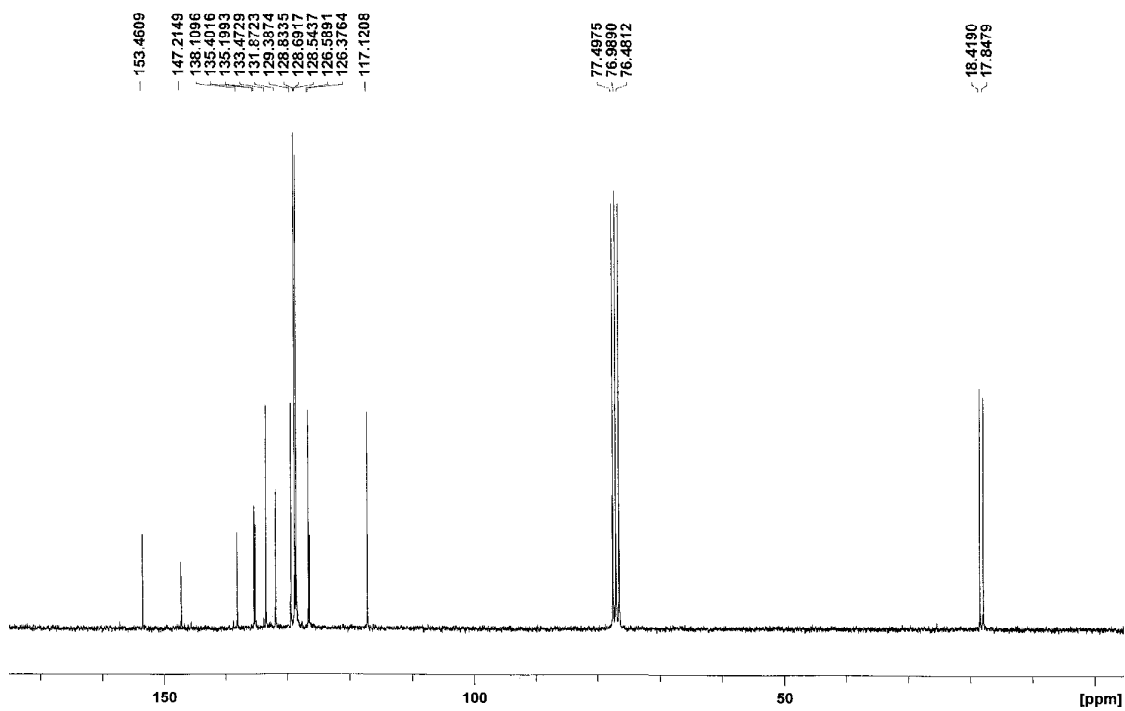

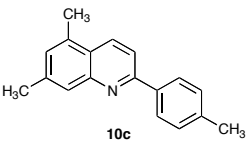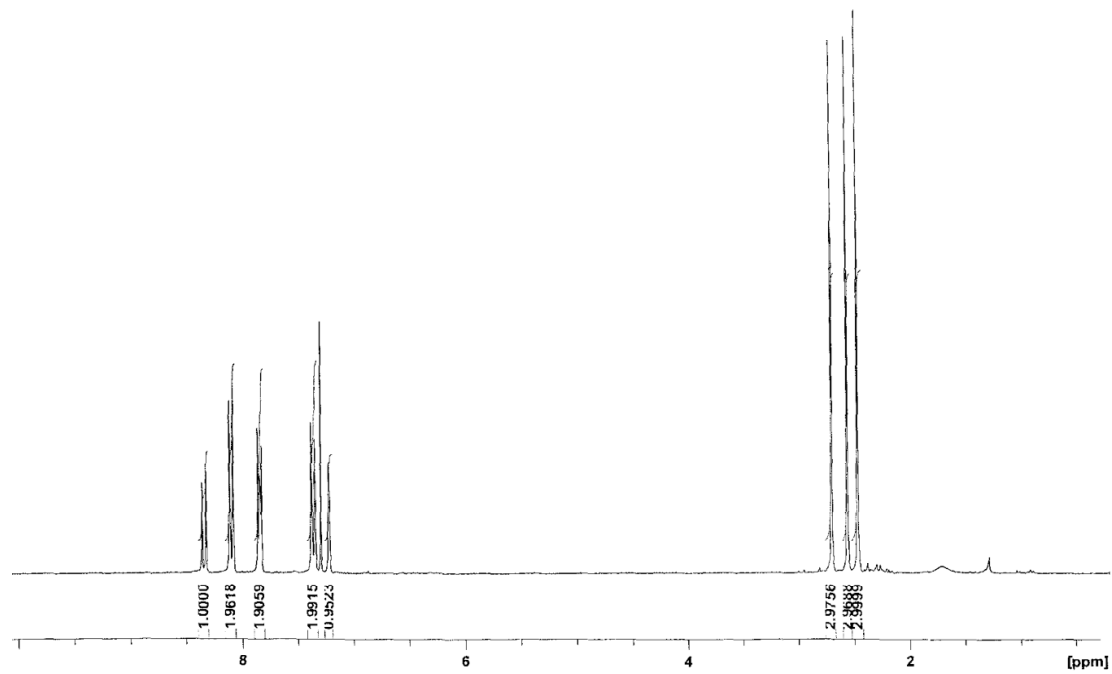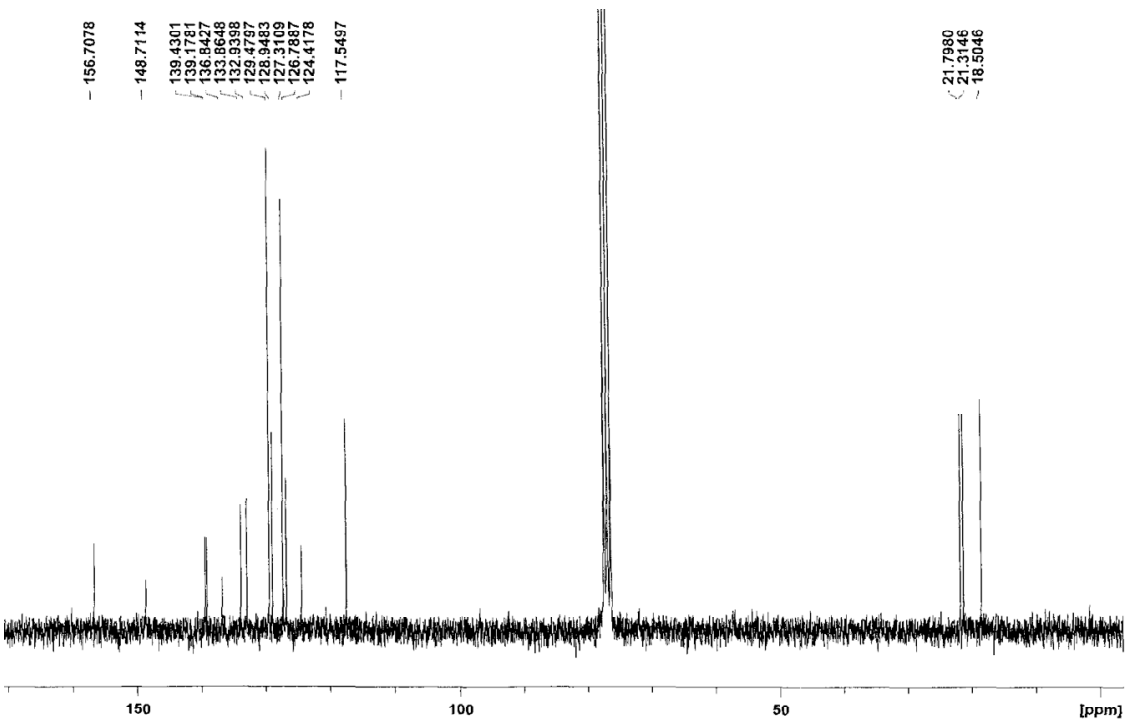

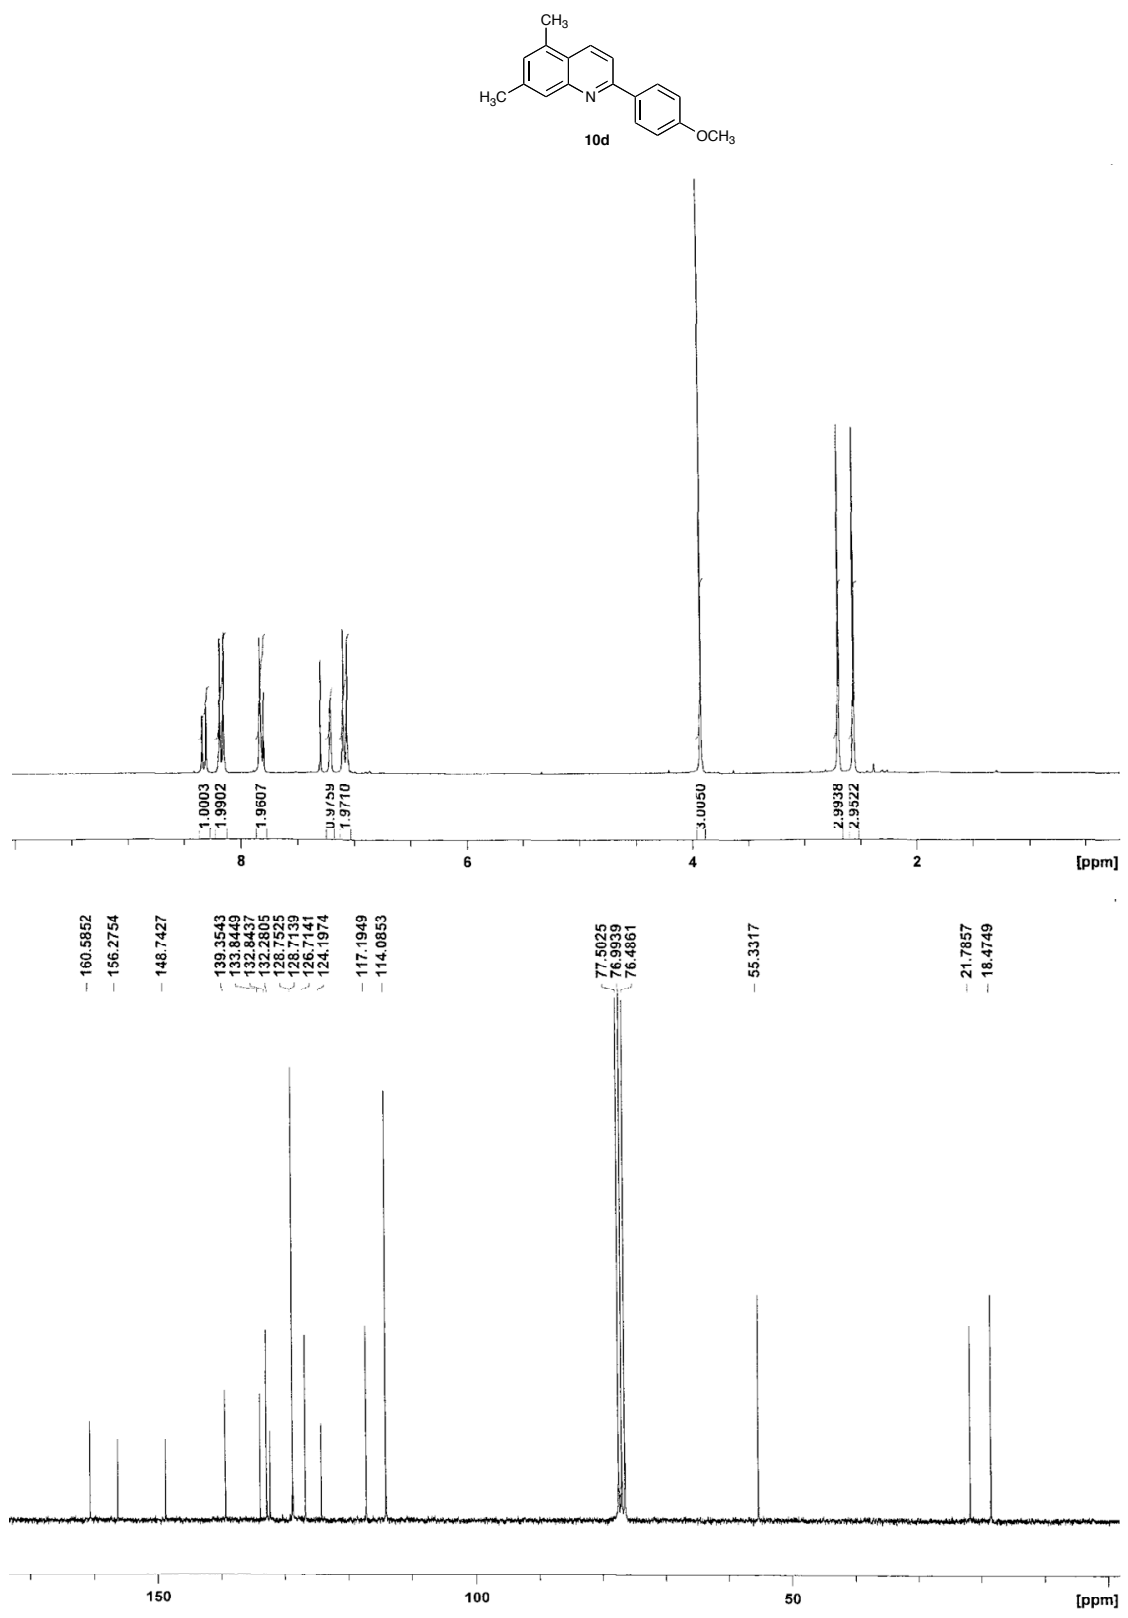

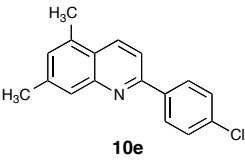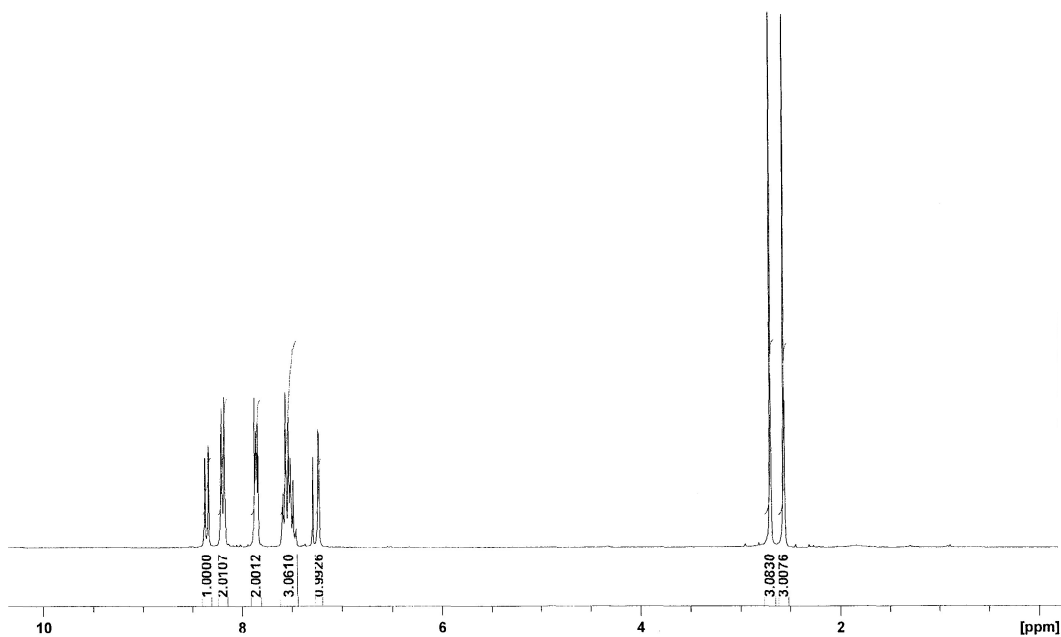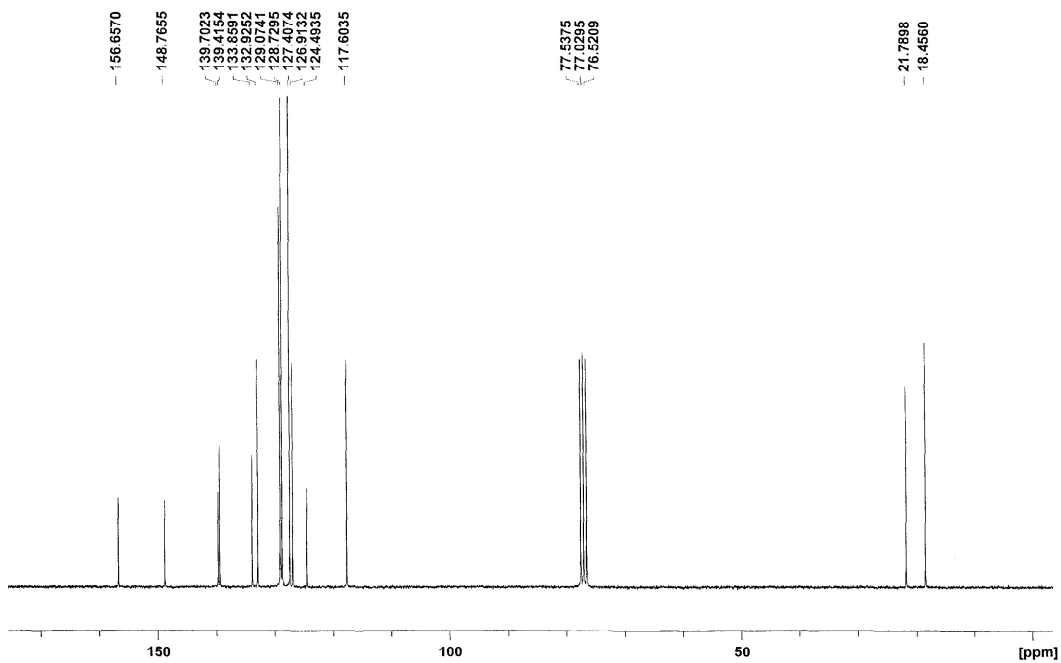



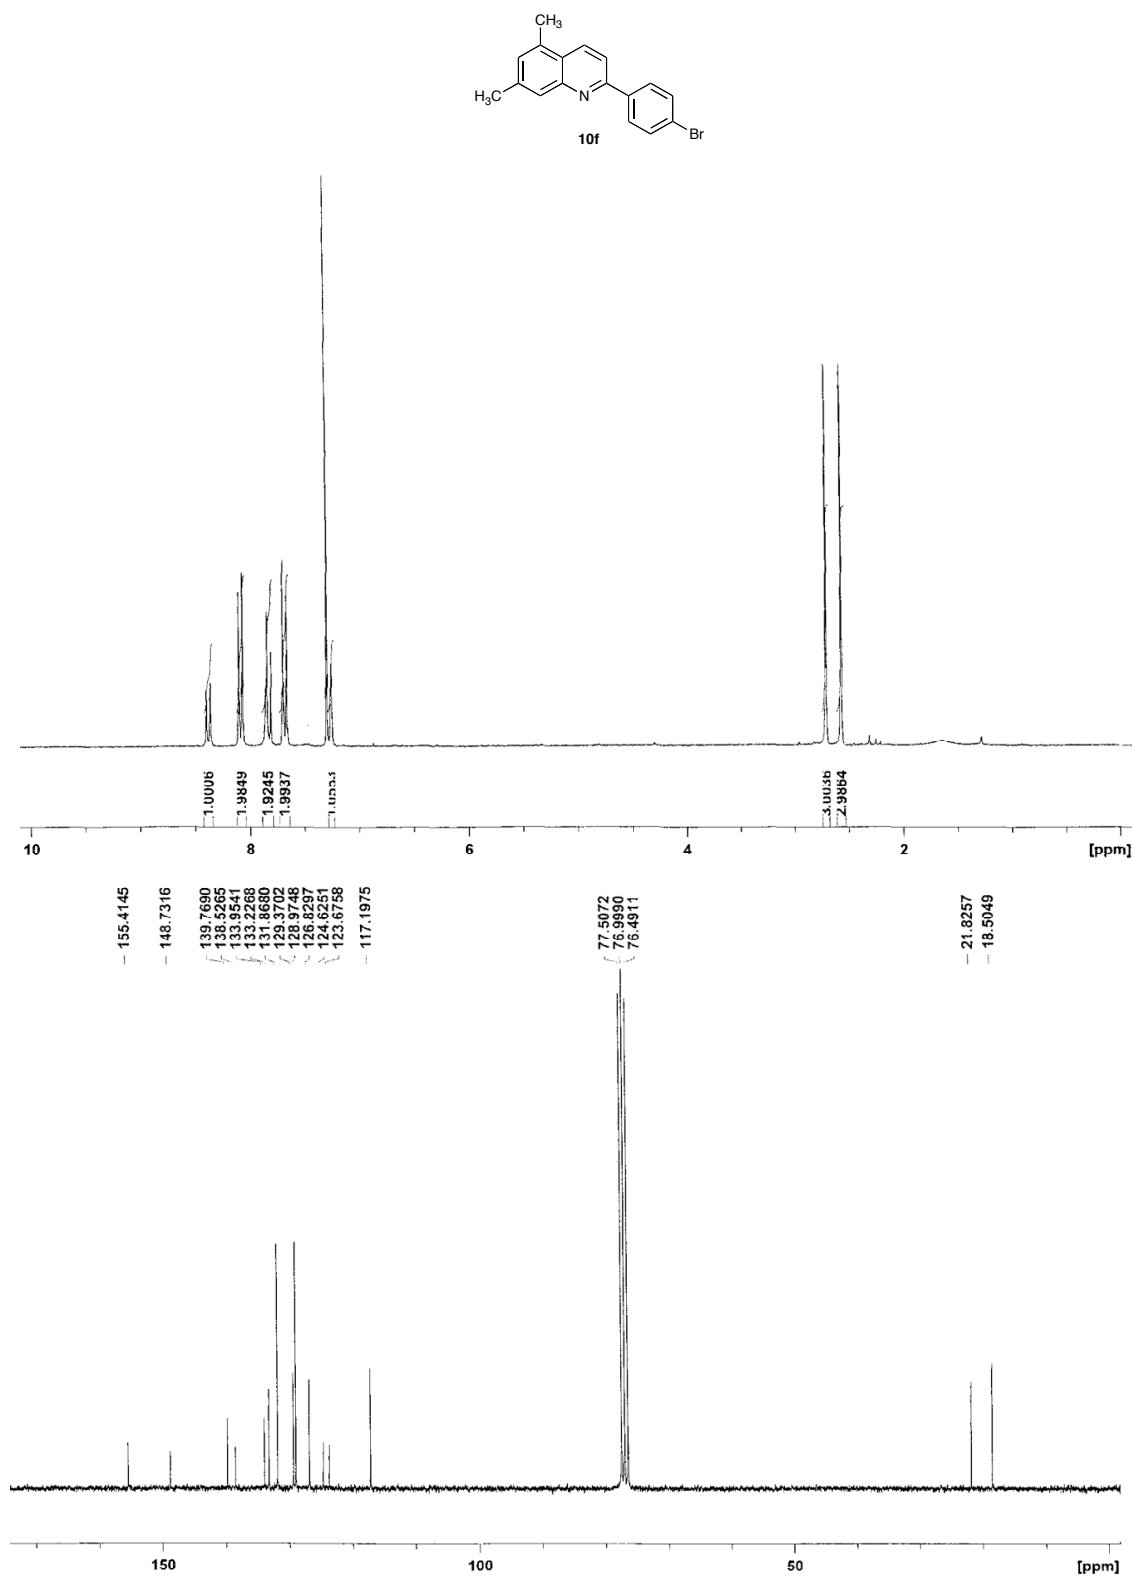

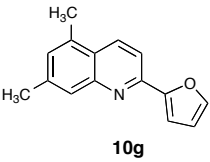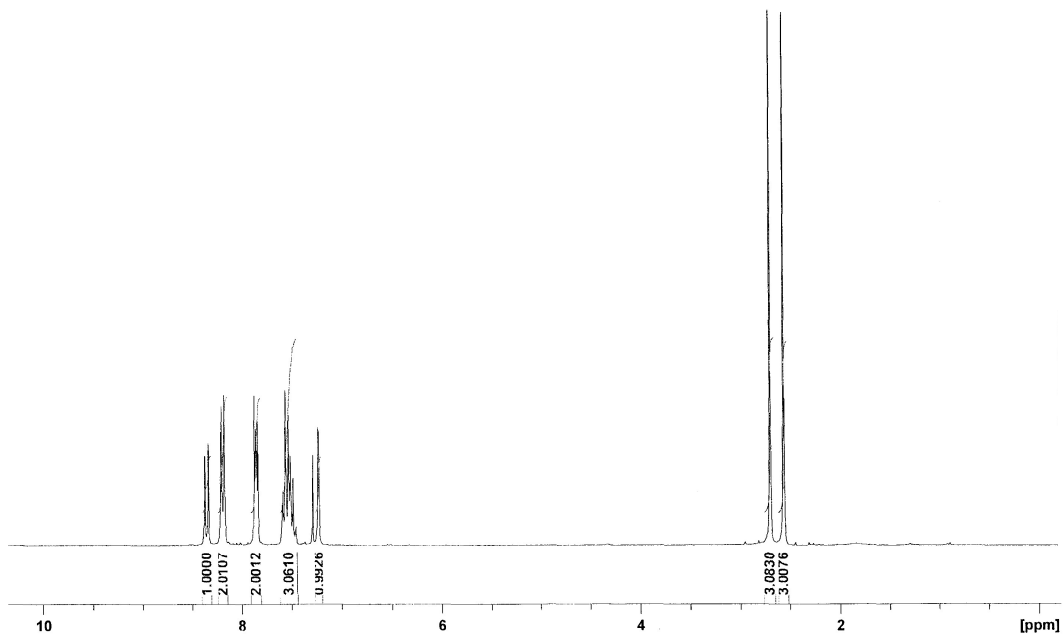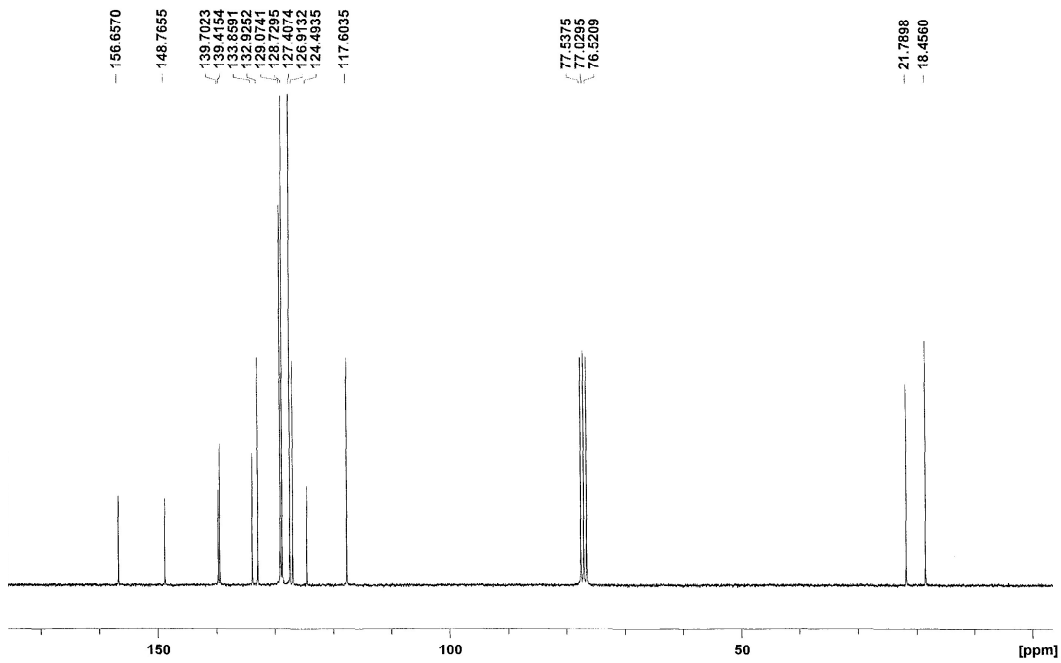

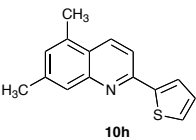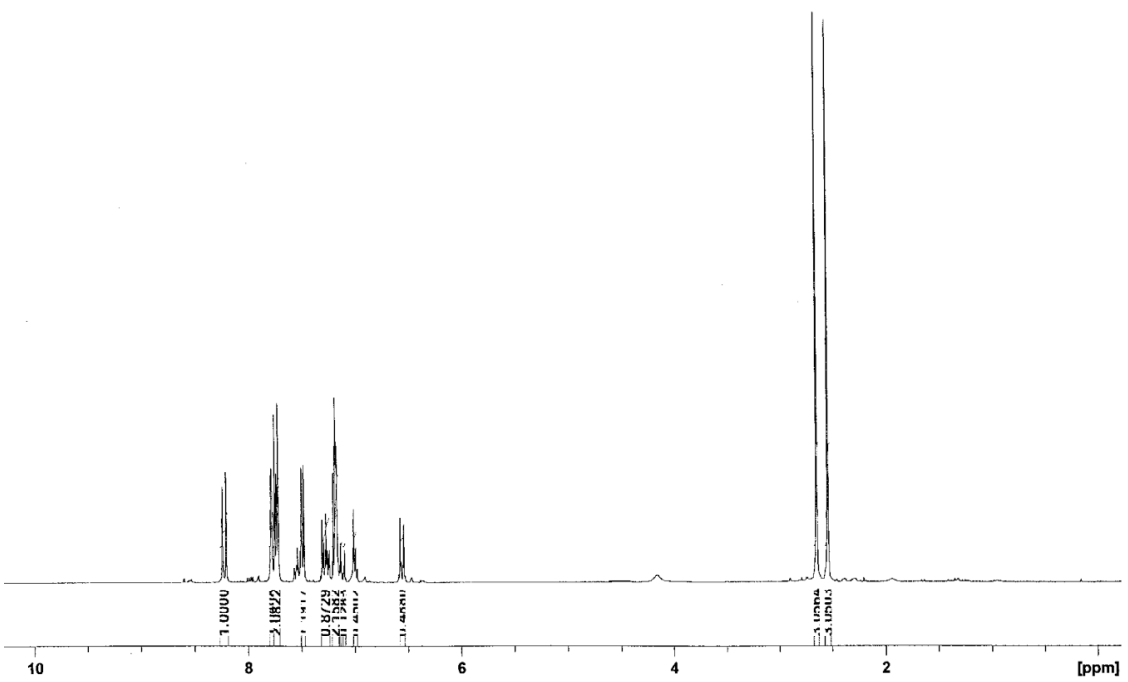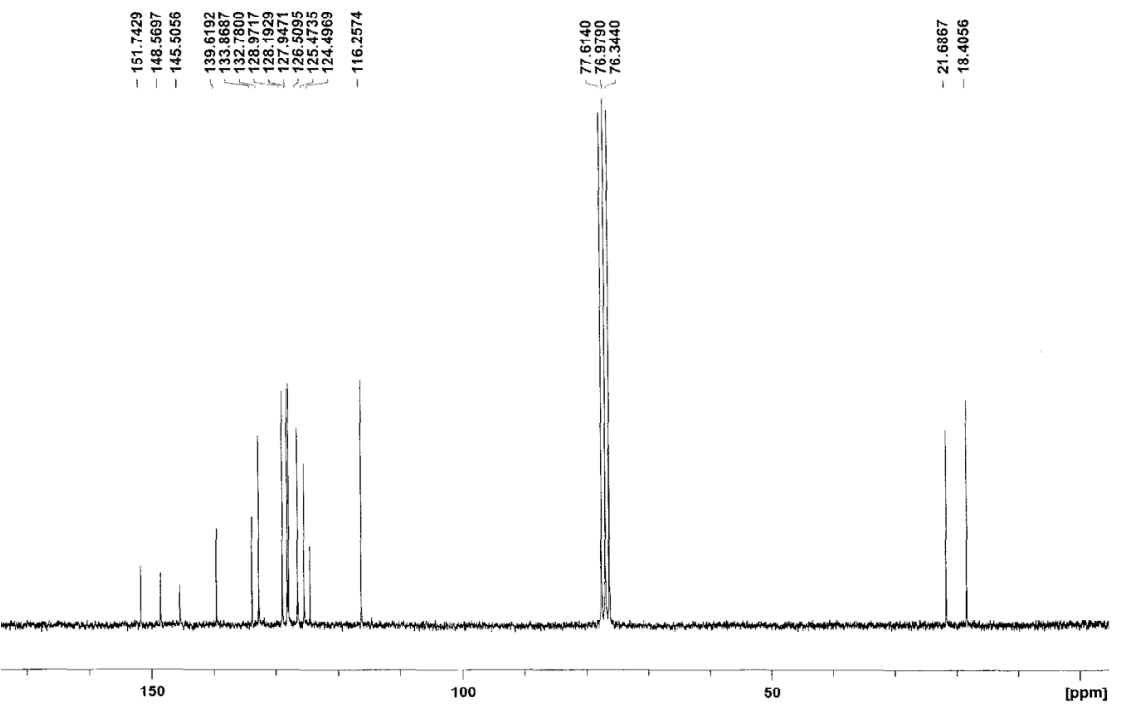

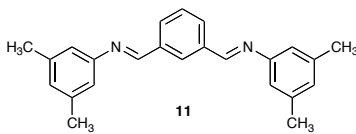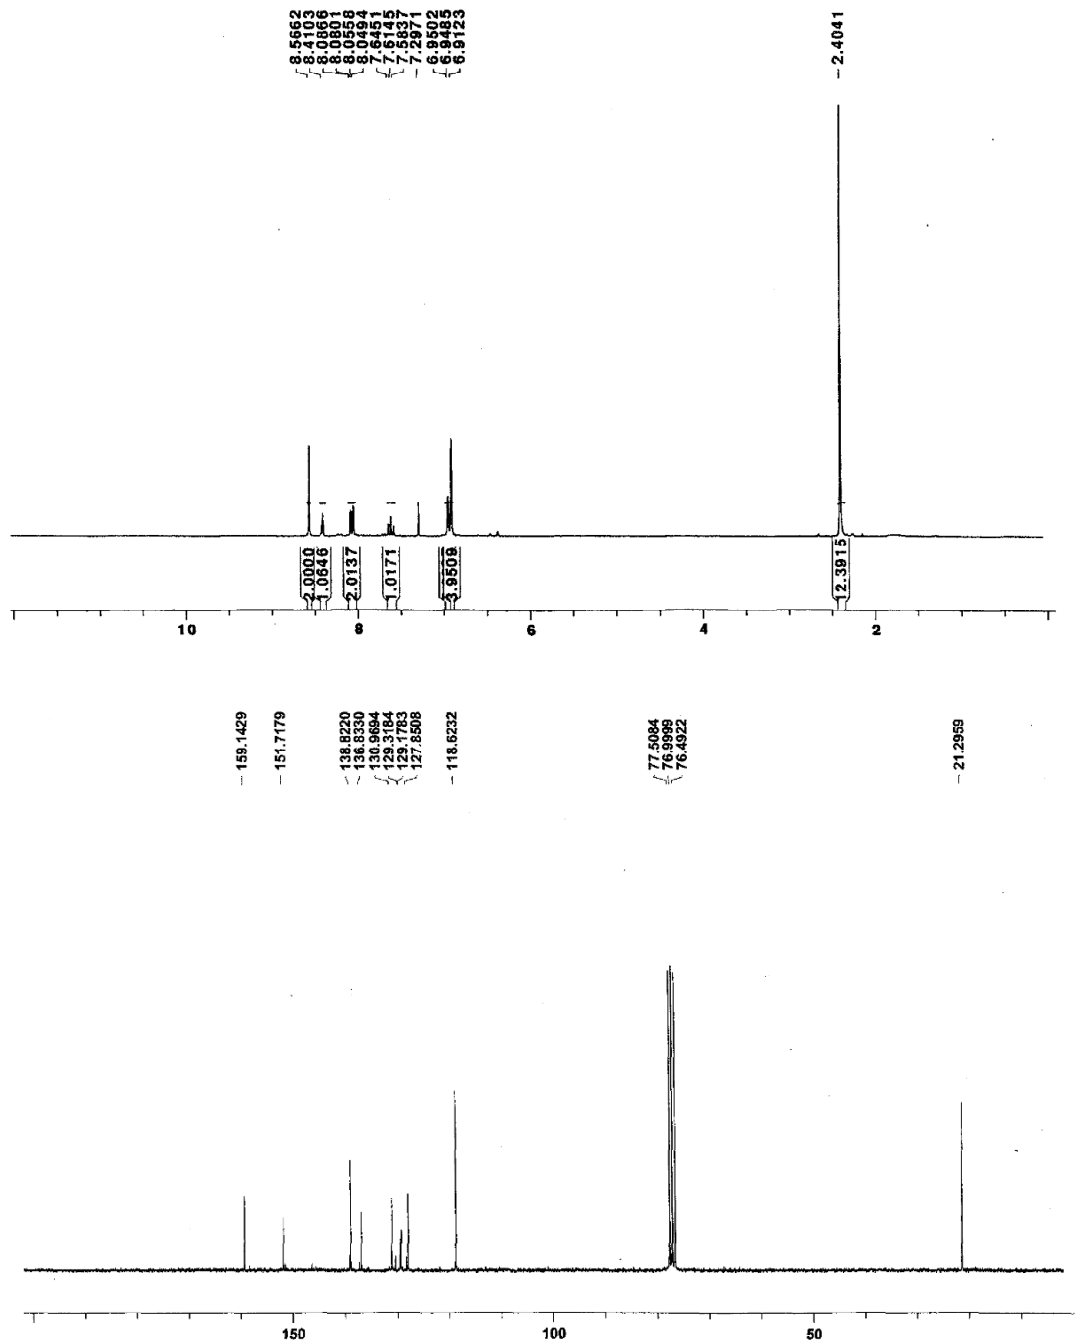

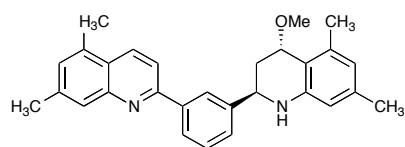

12

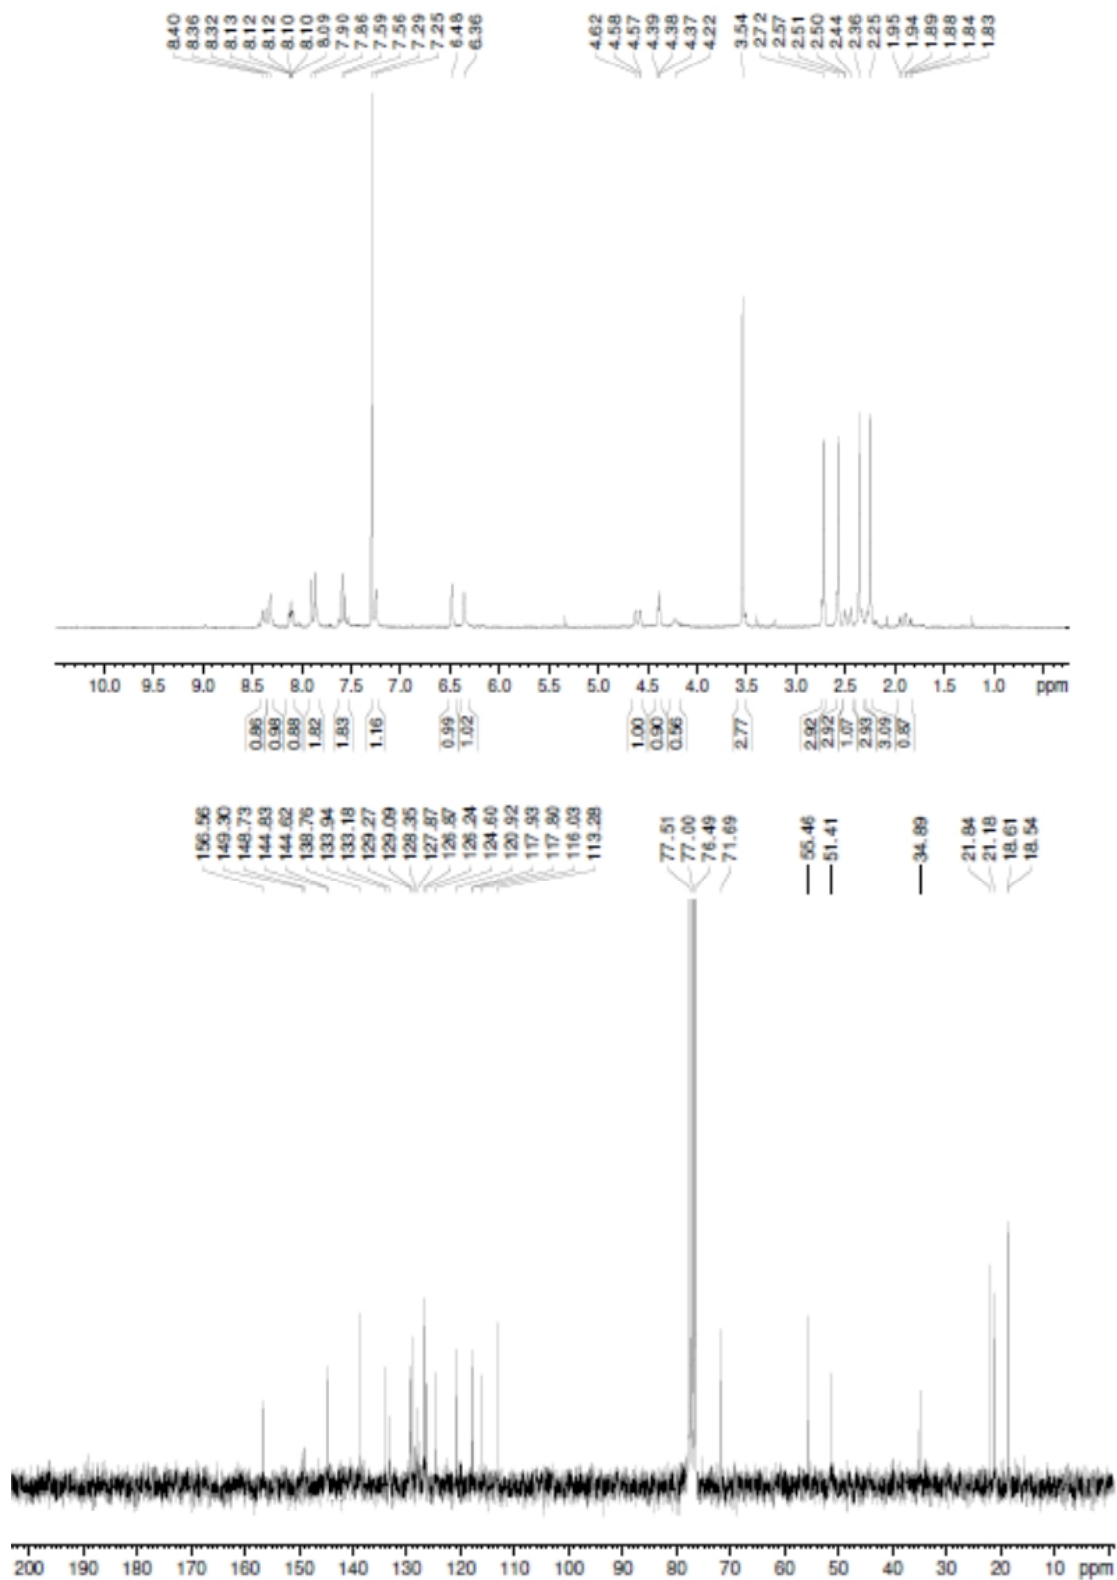

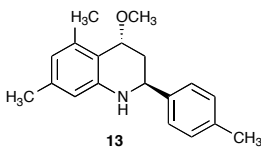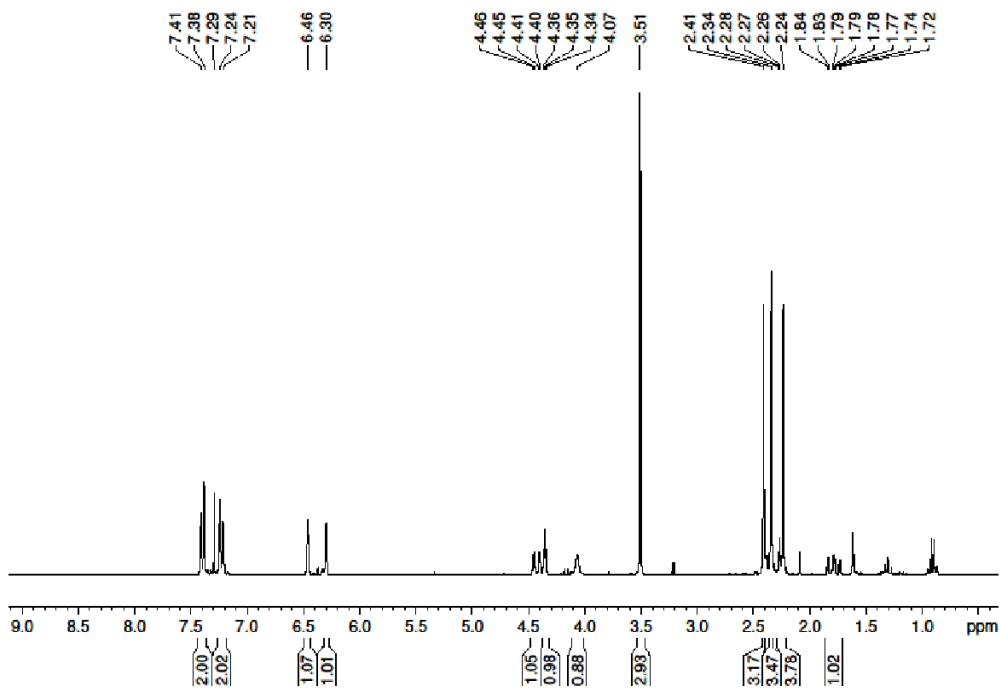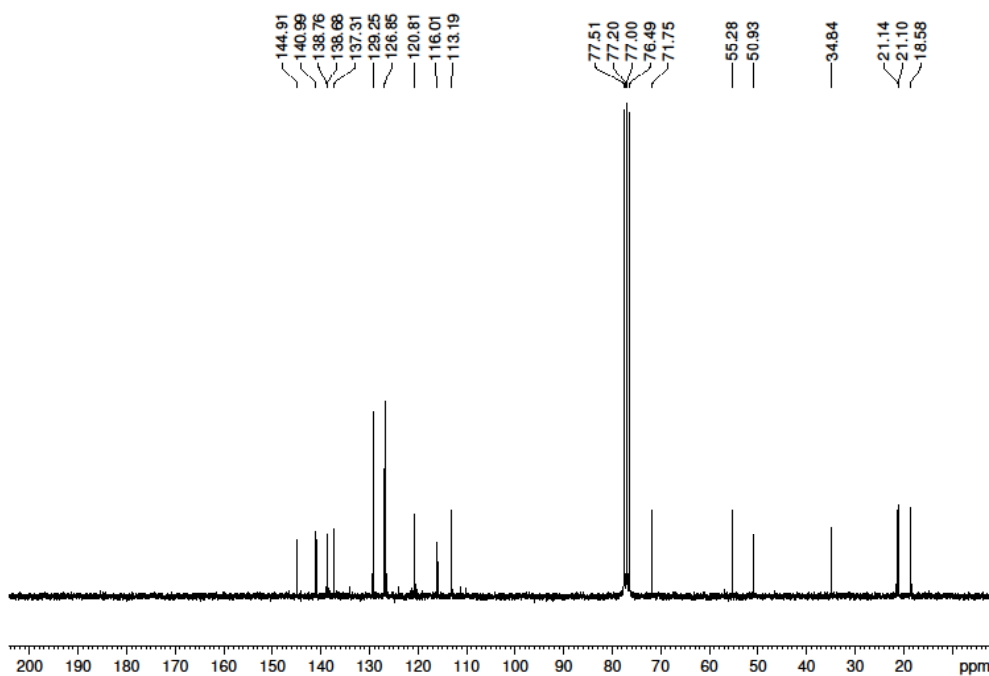

Supplement: c2ob26754c.pdf [file c2ob26754c.pdf]
